1 The petrosal and basicranial morphology of *Protoceras celer*

2 **Short title:** *Protoceras celer* petrosal morphology

3

4 Selina Viktor Robson<sup>1\*</sup>, Brendon Seale<sup>2</sup>, Jessica M. Theodor<sup>1</sup>

5 <sup>1</sup> Department of Biological Sciences, University of Calgary, Calgary, Alberta, Canada

6 <sup>2</sup> Lunenfeld-Tanenbaum Research Institute, Sinai Health System, Toronto, Ontario, Canada

7

8

9

10

11

12

13

14

15

16

17

18

19

20

21

22

## 23 **Abstract**

24 Protoceratids are an extinct family of endemic North American artiodactyls. The phylogenetic  
25 position of protoceratids in relation to camelids and ruminants has been contentious for over a  
26 century. The petrosal morphology of basal (*Leptotragulus*) and derived (*Syndyoceras*)  
27 protoceratids has suggested that protoceratids are closely related to ruminants, whereas a  
28 prior description of a disarticulated intermediate protoceratid petrosal (*Protoceras celer*)  
29 indicated that protoceratids were closely related to camelids. This contradictory evidence  
30 implied that there were several character reversals within the protoceratid lineage and brought  
31 into question the utility of basicranial characters in artiodactyl phylogenetics. Here, we provide  
32 descriptions of an additional *P. celer* petrosal. The descriptions are based on data produced by  
33 computed tomography scans, which allowed us to image the petrosal *in situ* in the skull. Our  
34 results indicate that the petrosal morphology of *P. celer* is similar to that of other protoceratids,  
35 implying that, contrary to previous evidence, petrosal morphology is conserved within the  
36 Protoceratidae.

## 37 **Introduction**

38 The Protoceratidae represent an early lineage of North American artiodactyls with  
39 elaborate cranial ornamentation. Several of the most basal taxa are hornless, but males of  
40 more derived species bear horns on the frontals, parietals, nasals, and/or the occiput [1–3].  
41 Females typically lack horns but bear rough patches in the same locations [2]. Protoceratids  
42 range in body mass from 20 kg to 350 kg and are also sexually dimorphic with respect to overall  
43 body size [3].

44 Protoceratids first appeared in the middle Eocene (early Uintan) and persisted into the early  
45 Pliocene (latest Hemphillian) of North and Central America [4]. The family is subdivided into the  
46 “Leptotragulinae”, the Protoceratinae, and the Synthetoceratinae [5]. The “leptotragulines” are  
47 a paraphyletic assemblage of basal Eocene hornless forms [4]. The protoceratines consist of  
48 most of the smaller horned taxa, including *Protoceras*. Known protoceratine taxa range from  
49 the early Oligocene (Whitneyan) to the late Miocene (Clarendonian) [2]. Synthetoceratines first  
50 appeared in the early Miocene (early late Arikareean) and persisted until the early Pliocene  
51 (late Hemphillian) [6]. The synthetoceratines are larger-bodied, derived protoceratids  
52 characterized by their rostral “slingshot” and orbital horns in the males.

53 Apart from the presence of cranial appendages, protoceratids exhibit a morphology  
54 typical of generalized selenodont artiodactyls, including a basic selenodont dentition.  
55 Protoceratids have elongated limbs and a fused ectomesocuneiform, but their cuboid and  
56 navicular remain separate and their metapodial keels are incomplete [4]. Protoceratines and  
57 synthetoceratines have a complete postorbital bar, but this condition is not present in basal  
58 members of the family [7].

59 The phylogenetic affinities of protoceratids have been the subject of considerable  
60 dispute. Protoceratids were originally allied with ruminants, a view that persisted for half a  
61 century [8–16]. Like ruminants, protoceratids lack upper incisors and possess an incisiform  
62 lower canine. The protoceratid auditory bulla is hollow and is compressed between the glenoid  
63 fossa and the exoccipital. Yet protoceratids lack a cubonavicular, one of the most distinctive  
64 ruminant synapomorphies [17].

65 “Leptotragulines” have historically been placed in Tylopoda [11–13], but the more  
66 derived protoceratids were not allied with camelids (and other tylopods) until the mid-  
67 twentieth century [2,6,18–24]. This shift in systematics was largely driven by morphological  
68 similarities between protoceratids and camelids. It is now understood that most of these  
69 similarities are plesiomorphic (e.g., incomplete metapodial keels, unfused cuboid and navicular)  
70 or homoplastic (e.g., elongate limbs, complete postorbital bar). The one unusual morphology  
71 shared by protoceratids and camelids is the location of the vertebrarterial canal—both families  
72 have a vertebral artery canal that passes through the pedicles of the cervical vertebrae. This  
73 condition is only found in camelids, protoceratids, and the endemic European xiphodontids  
74 [4,21]. However, protoceratids lack other morphologies that have been associated with  
75 camelids, such as the presence of a dorsally-projecting angular hook on the dentary and an  
76 inflated auditory bulla filled with cancellous bone [4].

77 This conflicting osteological evidence has presented challenges for inferring protoceratid  
78 relationships. At the turn of the twenty-first century, novel information became available; the  
79 endocranial morphology of the basal “leptotraguline” protoceratid *Leptotragulus* and the  
80 derived synthetocerine protoceratid *Syndyoceras* were described. The morphology of  
81 *Syndyoceras* was described from computed tomography (CT) scans [25] and the morphology of  
82 *Leptotragulus* was described from physical dissections of the fossil [7]. Based on these  
83 descriptions, Joeckel, Stavas, and Norris all concluded that protoceratid endocranial  
84 morphology is more similar to that of ruminants than to that of camelids, suggesting that early  
85 workers may have been correct in placing protoceratids with ruminants [7,25].

86 An additional description of a protoceratid petrosal was provided in an American  
87 Museum of Natural History monograph [26]. This detailed description was of AMNH-VP 645, a  
88 skull and disarticulated petrosal attributed to *Protoceras celer* [26]. This specimen, in contrast  
89 to the UNSM 1153 *Syndyoceras* material and the YPM and MCZ *Leptotragulus* material  
90 described by Joeckel and Stavas [25] and Norris [7], showed a deep subarcuate fossa and no  
91 sharp demarcation ridge along the endocranial face of the petrosal. The petrosal characters for  
92 *P. celer* were coded in a phylogenetic analysis based on AMNH-VP 645 [27]. The total evidence  
93 phylogenetic analysis recovered protoceratids in a position within Ruminantia, but the  
94 morphological phylogenetic analysis recovered protoceratids in a position close to camelids,  
95 supporting the interpretation that protoceratids are tylopods [27].

96 The description of AMNH-VP 645 calls into question characters for *Syndyoceras* [25] and  
97 differs from the description of *Leptotragulus* [7]. There are two potential explanations for these  
98 discrepancies: *P. celer* represents several character state reversals within Protoceratidae, or the  
99 AMNH-VP 645 petrosal is incorrectly attributed to *P. celer*. We tested these explanations by  
100 subjecting two skulls of *P. celer* [AMNH-VP 1229; AMNH-VP 53523] to CT scanning and  
101 reconstructed the petrosal from the CT scan data. Our results indicate that AMNH-VP 53523  
102 has a petrosal morphology like that of other protoceratids, implying that the AMNH-VP 645  
103 petrosal was incorrectly referred to *P. celer*.

## 104 **Materials and Methods**

105 **Institutional Abbreviations**—AMNH-VP, American Museum of Natural History, New York;  
106 UCMZ, University of Calgary Museum of Zoology, University of Calgary; MCZ, Museum of  
107 Comparative Zoology, Harvard University; UNSM, University of Nebraska State Museum

108 paleontology collections, University of Nebraska, Lincoln; YPM, Yale Peabody Museum, Yale  
109 University; ZM, University of Nebraska State Museum mammalogy collections.

110 **Material**—AMNH-VP 1229 and AMNH-VP 53523 are skulls, referred to *Protoceras celer*, from  
111 the Poleside member of the Brule Formation, South Dakota, both of Whitneyan age [2]. The  
112 right side of AMNH-VP 1229 has minor dorsoventral compression, but the specimen is mostly  
113 complete. There is slight damage to the dorsal skull roof, and the ventral portion of the left  
114 orbit is missing. AMNH-VP 1229 is identified as a female because it lacks the cranial  
115 ornamentation present in males and is smaller in size (Fig 1A-C).

116 **Fig 1. Photographs of the *Protoceras celer* specimens included in this study.**

117 (A) Ventral view of AMNH 1229. (B) Dorsal view of AMNH 1229. (C) Right lateral view of AMNH  
118 1229. (D) Ventral view of AMNH 53523. (E) Dorsal view of AMNH 53523. (F) Right lateral view of  
119 AMNH 53523.

120 AMNH-VP 53523 has not been completely prepared and matrix remains on much of the  
121 basicranium. The skull is crushed dorsoventrally but maintains its original width. Cranial  
122 appendages are present but damaged, aside from the intact right rostral horn. AMNH-VP 53523  
123 is identified as a male because of the presence of cranial appendages and larger size (Fig 1D-F).

124 **Computed Tomography Scan**—AMNH-VP 1229 and AMNH-VP 53523 were subjected to micro-  
125 computed tomography ( $\mu$ CT) scanning at the High-Resolution Computed Tomography Facility at  
126 the University of Texas at Austin. Both skulls were initially scanned at a 0.5 mm thickness using  
127 the P250D x-ray detector operating at 419 kV and 1.8  $\mu$ A. These scans produced a stack of 140  
128 images for AMNH-VP 1229 and a stack of 151 images for AMNH-VP 53523, both at a resolution  
129 of 1024 x 1024. AMNH-VP 1229 was found to have several high-density deposits in the

130 basicranial region. These high-density deposits distorted the CT images and removed AMNH-VP  
131 1229 as a candidate for high-resolution imaging.

132 The basicranium of AMNH-VP 53523 was subsequently scanned at a thickness of  
133 0.07436 mm using the II x-ray detector operating at 210 kV and 0.11  $\mu$ A. This produced a set of  
134 300 slices at 1024 x 1024 resolution, covering approximately 22.308 mm of the basicranium,  
135 starting at the occipital condyles and ending just rostral to the petrosal.

136 Cranial morphologies were reconstructed from the CT scans using Amira 5.3 for Mac OS  
137 X (Visage, Inc., Chelmsford, MA: <http://www.visage.com>).

138 Comparative specimens (UCMZ 1989.47; UCZM 1975.496) were CT scanned at the  
139 Centre for Mobility and Joint Health, McCaig Institute for Bone and Joint Health, University of  
140 Calgary, using a Dual-energy CT/GSI (GE Revolution HD GSI, 140 kV and 80 kV fast switching).

141 **Measurements**—All measurements were taken using the 3D measurement tool of Amira.

142 Basicranial length measurements were based on the protocols outlined by Janis [28]. Total skull  
143 lengths were measured from the tip of the rostrum to the caudal-most point of the occiput.

144 Length and width measurements of the anterior semicircular canal were made following the  
145 protocol of Janis [28], and the arc radius was calculated using the equation provided by Ekdale  
146 [30]. Height and width measurements of the cochlea were made following Silcox et al. [31].

147 **Body Mass Estimates**—Body mass (BM) estimates were calculated for AMNH-VP 53523 but not  
148 AMNH-VP 1229. This is because most endocranial data comes from AMNH-VP 53523. Estimates  
149 for AMNH-VP 53523 were based on the predictive body mass regressions proposed by [28]. We  
150 used the “ruminants only” total skull length (SL) and basicranial length (BL)] regressions to  
151 estimate body mass. We chose to use the “ruminants only” regressions because the cranial

152 morphology of *P. celer* greatly resembles that of a ruminant [28]. The “all artiodactyls”  
153 regressions, particularly the total skull length regression, produced unrealistically large body  
154 mass estimates that conflict with prior results [28]. The two ruminant body mass equations  
155 used are:

156 
$$\text{Total skull length: } \log_{10} BM (kg) = 2.969(\log_{10} SL) - 2.348$$

157 
$$\text{Basicranial length: } \log_{10} BM (kg) = 3.218(\log_{10} SL) - 1.209$$

158 **Agility Scores**—Agility scores (AGIL) were calculated using the anterior semicircular canal radius  
159 (ASCR) “all mammals” predictive equation of Spoor et al. [29]. This is because only the anterior  
160 semicircular canal was preserved in enough to detail to measure the width and height. We used  
161 two body mass estimates, based on different cranial variables, in our calculations. This provided  
162 a range of likely agility scores. The anterior semicircular canal equation is:

163 
$$ASCR: \log_{10} AGIL = 0.850 - 0.153(\log_{10} BM) + 0.706(\log_{10} ASCR)$$

164 Body mass in the AGIL predictive equation is in grams, whereas the body masses calculated  
165 from the Janis [28] regressions are in kilograms. As such, a simple conversion is required.

## 166 **Results**

167 The external morphology of *Protoceras* was thoroughly described by previous authors  
168 [2,8–10,18] so only a brief description of external morphology will be presented here. AMNH-  
169 VP 1229 is better preserved externally and AMNH-VP 53523 is better preserved internally. As  
170 such, descriptions are based on a composite of the two skulls, with external descriptions  
171 primarily based on AMNH-VP 1229 and endocranial descriptions primarily based on AMNH-VP  
172 53523.

## 173 **Rostrum, Orbit, and Cranial Vault**



174           The preorbital region is long and narrow, comprising approximately 2/3 of the total skull  
175 length (Fig. 1). The nasal bones are small and the external nares are large, spanning the  
176 majority of the rostrum. The nasals meet at a pointed process above the external nares. AMNH-  
177 VP 53523 has rostral horn-like cranial appendages on the nasals (Fig. 1E-F).

178           There are facial vacuities on the rostrum at the level of P3 (Fig 1. C, F). These vacuities  
179 have a well-defined rostral margin and an indistinct caudal margin. On AMNH-VP 1229, the  
180 palatine canal opens as a small foramen on the ventrocaudal edge of the left facial vacuity. A  
181 crest extends from the ventrocaudal margin of the vacuity to the anterior margin of the orbit.  
182 The dorsal surface of this crest is textured. AMNH-VP 1229 has a distinct infraorbital foramen  
183 just rostral to the orbit (Fig. 1C).

184           The orbits are large with a complete postorbital bar. On AMNH-VP 53523, there are  
185 cranial appendages projecting upwards from the dorsal border of the orbits (Fig. 1E). The  
186 orbital bones are thin, and the sutures are difficult to distinguish. The lacrimal appears to be a  
187 large bone pierced ventrally by the lacrimal canal. The zygomatic arch slopes ventrally from the  
188 squamosal to the orbit (Fig. 1C). The interorbital area (comprising the frontals) is mostly flat  
189 with a slight caudal incline (Fig. 1C, F). Two distinct, bilateral crests originate from the  
190 interorbital region, one directed rostrally and the other directed caudally. The rostral crests  
191 extend anteriorly onto the nasals. The caudal crests originate at the dorsocaudal margin of the  
192 orbit and extend posteriorly as bilateral sagittal crests, eventually joining in the midline of the  
193 occiput and then intersecting with the shield-like nuchal crest. On AMNH-VP 53523, the sagittal  
194 crests become the parietal cranial appendages (Fig. 1E). The parietals are smooth with no

195 distinctive foramina or projections, except for a short zygomatic process that contributes to the  
196 postorbital bar.

197 The dentition of *P. celer* is fully described in previous publications [2,18]. Both skulls  
198 have canines; however, the canines of AMNH-VP 1229 are greatly reduced compared to those  
199 of AMNH-VP 53523 (Fig. 1 A, D). The palate is narrow and flat. The palatine crests and the  
200 pterygoid processes of the sphenoid are tall, and the internal nares are visible along the  
201 midline. The palatal region is mediolaterally constricted.

## 202 **Squamosal**

203 The glenoid fossa of the squamosal is mediolaterally elongate with a slightly convex  
204 articular surface (Fig. 1A, C and Fig. 2A). A small, non-pneumatized postglenoid process borders  
205 the glenoid fossa. The postglenoid foramen penetrates the caudal face of the postglenoid  
206 process. Internally, contact between the squamosal and the petrosal is interrupted by a sinus  
207 venosus temporalis (Fig 3C). The presence of a foramen jugular spurium, an opening for the  
208 sinus venosus temporalis, cannot be confirmed because the bony elements are not in tight  
209 articulation. The presence of a glenoid foramen cannot be confirmed for the same reason.

## 210 **Fig 2. CT renderings of the basicranium of AMNH 53323.**

211 (A) Ventral view. (B) Left lateral view. Abbreviations: Boc, basioccipital; Ect, ectotympanic; Exo;  
212 exoccipital; Pop; paroccipital process of exoccipital; Sq, squamosal.

## 213 **Fig 3. Transverse CT slices of AMNH 53323 showing important morphological features.**

214 (A) Slice 88. (B) Slice 107. (C) Slice 131. Abbreviations: Boc, basioccipital; Pet; petrosal

215 A large rostrocaudally directed canal runs through the ventral part of the squamosal,  
216 piercing the skull above the glenoid fossa. We identify this exit as the supraglenoid foramen

217 based on AMNH-VP 1229. A similar foramen could not be identified on the surface of AMNH-VP  
218 53523, but the internal canal is clearly visible in CT cross-sections (Fig. 3A). The canal appears to  
219 terminate caudally around the rostral margin of the ectotympanic, but the exact point of  
220 termination is indistinct.

### 221 **Ectotympanic**

222 The lateral portion of the ectotympanic is present in AMNH-VP 53523. The  
223 ectotympanic comprises the entirety of the *Protoceras* auditory bulla [10], but the bullar  
224 portion of the bone is missing from the specimen. AMNH-VP 1229 has a superficially complete  
225 auditory bulla but the internal structures are not preserved (Fig 1A). The bulla is small and  
226 uninflated and the anteromedial side projects as a wide and blunt styliform process. The bullar  
227 portion of the ectotympanic sits between the squamosal, basioccipital, and paroccipital process  
228 of the exoccipital. There is a gap between the bulla and the basioccipital in AMNH-VP 1229, but  
229 no internal structures, including the petrosal, can be seen because of poor internal  
230 preservation.

231 The external auditory meatus is located between the postglenoid process and post-  
232 tympanic process of the squamosal (Fig. 2B). Both the squamosal and the ectotympanic  
233 contribute to the external auditory meatus; the rostral and ventral borders of the meatus are  
234 formed by the dorsal margin of the ectotympanic, and the dorsal and caudal borders of the  
235 meatus are formed by the squamosal (Fig 2B). There is a gap between the postglenoid process  
236 and the rostral face of the ectotympanic, but the caudal face of the ectotympanic and the post-  
237 tympanic process are in articulation. The ectotympanic extends as a compressed plate ventral

238 to the external auditory meatus. The ventral border of this plate is missing in both specimens,  
239 but CT scans of AMNH-VP 53523 show that the plate is filled with cancellous bone.

#### 240 **Bony Labyrinth**

241 Sections of both the left and right bony labyrinths are preserved in AMNH-VP 53523.

242 The left bony labyrinth is more complete and will be the basis of this description (Fig. 4). The  
243 cochlear canal makes approximately 2.75 turns (rotation of  $990^\circ$ ), but the exact termination  
244 point of the apex cannot be identified. Several sections of the cochlear canal are infilled with  
245 sediment, obscuring the borders and making it unclear whether the basal and secondary turns  
246 naturally contact each other. The aspect ratio, calculated by dividing the height of the spiral by  
247 the width of the basilar turn [31], is approximately 0.80.

248 **Fig 4. CT renderings of the bony labyrinth (and surrounding petrosal, upper images) of AMNH**  
249 **53323.**

250 (A) Medial (endocranial) view. (B) Rostral view. (C) Ventrolateral view.

251 The vestibule is represented by a slightly bulbous saccule (spherical recess) and utricle  
252 (elliptical recess). The saccule, which is a medial bulge extending from the fenestra vestibuli, is  
253 more inflated than the utricle. The utricle sits between the saccule and the anterior ampulla of  
254 the anterior semicircular canal. The anterior semicircular canal is the only semicircular canal  
255 fully preserved in the left bony labyrinth (Fig. 4). The posterolateral base of the lateral  
256 semicircular canal is present, but the path of the canal cannot be traced. No part of the  
257 posterior semicircular canal could be reliably identified; a structure identified as the medial  
258 portion of the vestibular aqueduct may include the root of the posterior semicircular canal, but  
259 this cannot be confirmed. Fragments of both the anterior and posterior semicircular canals,

260 including the common crus, are present in the right bony labyrinth. The right lateral  
261 semicircular canal could not be located.

262 The left anterior semicircular canal is sigmoidal and lies in more than one plane. The  
263 anterior portion of canal projects rostrally, throwing that part of the semicircular canal into a  
264 tight arc. The path of the canal is less curved posteriorly, becoming almost straight in the region  
265 of the common crus.

266 Other aspects of the bony labyrinth are discussed along with the morphology of the  
267 petrosal.

## 268 **Petrosal**

269 Most of the petrosal was captured in the high-resolution CT scan of AMNH-VP 53523  
270 (Fig. 5). The caudal portion of the mastoid region (along with other caudal structures) was not  
271 included, but the morphology of the petrosal can still be described.

### 272 **Fig 5. CT renderings of the left petrosal of AMNH 53323 in five orientations.**

273 (A) Lateral (tympanic) view. (B) Rostral view. (C) Medial (endocranial) view. (D) Ventrolateral  
274 view. (E) Ventral view. Abbreviations: Pr, promontorium; Tt, tegmen tympani.

275 The promontorium is hemi-ellipsoid with a well-rounded lateral face (Fig. 5A). A small  
276 epitympanic wing, which lacks a lateral process, projects rostrally from the anterior margin of  
277 the promontorium (Fig. 5A, C). The epitympanic wing is roughly triangular and forms the  
278 rostral-most part of the petrosal. A groove separates the epitympanic wing from the  
279 posteromedial flange, which begins just caudal to the epitympanic wing and projects ventrally  
280 from the lower margin of the promontorium (Fig. 5A). The rostral tympanic process is absent.

281           The promontorium lacks a transpromontorial sulcus and a stapedial artery sulcus. A  
282   circular, ventrocaudally directed fenestra cochleae opens at the caudal end of the  
283   promontorium (Fig. 5A, D). There is an indistinct caudal tympanic process posterior to the  
284   fenestra cochleae. The fenestra vestibuli is an oval opening dorsal to the fenestra cochleae, and  
285   a small secondary facial foramen lies just dorsal to the fenestra vestibuli (Fig. 4C and Fig. 5A, D).  
286   The path of the facial canal can be briefly traced internally from the secondary facial foramen,  
287   but quickly disappears. This may be because the facial canal, which transmits the facial nerve,  
288   drastically changes diameter or has been infilled with sediment.

289           A deep and circular fossa for the muscularis tensor tympani excavates the tegmen  
290   tympani just rostral to the fenestra vestibuli and the secondary facial foramen. The stapedial  
291   muscle fossa is a deep and wide depression directly caudal to the fenestra vestibuli and the  
292   secondary facial foramen (Fig. 5A). The stapedial muscle fossa terminates ventrally as the  
293   stylomastoid notch, which is the petrosal contribution to the stylomastoid foramen (Fig. 5A, D).  
294   In *P. celer*, the rest of the stylomastoid foramen is formed by the exoccipital and represents the  
295   exit of the facial nerve from the middle ear cavity.

296           On the pars canicularis, the tegmen tympani is moderately inflated with a distinctive,  
297   oval-shaped tegmen tympani fossa on the dorsomedial side (Fig. 5B). The tegmen tympani is  
298   pierced rostrally by a slit-like hiatus Fallopii (Fig. 4B and Fig. 5B). The path of the greater  
299   petrosal nerve can be traced from where it enters the foramen acusticum superius with the rest  
300   of the facial nerve to where it exits through the hiatus Fallopii (Fig. 4). The exact point at which  
301   the greater petrosal nerve diverges from the rest of the facial nerve cannot be located because  
302   the facial canal is incomplete. The greater petrosal nerve canal is slightly exposed at the rostral

303 end of the epitympanic recess, inside the fossa muscularis tensor tympani, just ventrolateral to  
304 where the nerve emerges through the hiatus Fallopii. This exposure may be the result of thin  
305 bone that has been eroded.

306 The lateral portion of the tegmen tympani curves ventrally to form the roof of the  
307 epitympanic recess, which is an elongated channel that originates caudal to the epitympanic  
308 wing and terminates at the stapedial muscle fossa (Fig. 5A, D). The epitympanic recess lacks a  
309 distinct fossa for the head of the malleus. A short crista parotica, situated caudal to the  
310 stapedial muscle fossa, separates the epitympanic recess from the mastoid region of the  
311 petrosal (Fig. 5A). The tympanohyal projects laterally from the crista parotica (Fig. 5A, D). The  
312 lateral border of the tympanohyal is indistinct and may either be broken or merged with the  
313 ectotympanic.

314 The mastoid region comprises more than half of the petrosal. The caudal part of the  
315 mastoid region was not captured in the high-resolution CT scan of AMNH-VP 53523, but the  
316 mastoid region is clearly large and wedge shaped (Fig. 5). As has been described previously [10],  
317 the mastoid region is exposed externally as a strip of bone sandwiched between the exoccipital  
318 and the squamosal (Fig. 2B). A mastoid plate is not present.

319 The tegmen tympani forms a right angle with the endocranial surface of the petrosal,  
320 and a short crista petrosa rostral to the subarcuate fossa separates the tegmen tympani fossa  
321 from the endocranial face (Fig. 5C). The internal acoustic meatus is deep with a smooth border.  
322 The foramen acusticum superius and foramen acusticum inferius are separated by a narrow  
323 crista transversa (Fig. 4A and Fig. 5C). The foramen acusticum inferius is large and opens  
324 caudally whereas the foramen acusticum superius is small and opens ventrally. A prefacial

325 commissure borders the dorsal side of the internal acoustic meatus, but no prefacial  
326 commissure fossa is present. The subarcuate fossa lies caudal to the internal acoustic meatus.  
327 The subarcuate fossa is wide and extremely shallow, appearing as a subtle depression in the  
328 petrosal. A petromastoid canal is present on the rostral border of the subarcuate fossa (Fig. 4  
329 and Fig. 5C). Internally, the petromastoid canal passes just inside the arc of the anterior  
330 semicircular canal, terminating halfway between the endocranial face and tympanic face of the  
331 petrosal.

332         The vestibular aqueduct, which carried the endolymphatic duct, travels from the  
333 common crus of the semicircular canals to emerge on the endocranial surface of the petrosal,  
334 ventrocaudal to the subarcuate fossa (Fig. 4 and Fig. 5C). A basicapsular groove (=petrobasilar  
335 canal [7]) runs along the ventral border of the petrosal (Fig. 3B). The cochlear aqueduct, on the  
336 ventromedial surface of the petrosal, sits medial to the basicapsular groove and slightly caudal  
337 to the internal acoustic meatus (Fig. 4 and Fig. 5E). Internally, the cochlear aqueduct originates  
338 just medial to the fenestra cochleae and is directed posteriorly as a long, thin channel. The  
339 cochlear aqueduct housed the perilymphatic duct in life.

#### 340         **Exoccipital**

341         The exoccipital of *P. celer* is dominated by a prominent paroccipital process that projects  
342 ventrolaterally, extending well beyond the ventral margin of the basioccipital (Fig. 2). A crest on  
343 the lateral side of the paroccipital process intersects with the nuchal crest. The mastoid portion  
344 of the petrosal is visible laterally as a narrow strip of bone between the ventral margin of the  
345 squamosal and the paraoccipital process. Based on AMNH-VP 1229, the paroccipital process  
346 and the ectotympanic bulla are in close contact (Fig. 1A).



347 **Basisphenoid**

348 The exact point of contact between the basioccipital and basisphenoid is ambiguous  
349 because of a transverse crack through the region on AMNH-VP 53523 (Fig. 1D). The  
350 basisphenoid is broad caudally and narrow rostrally, forming a rod that is bordered laterally by  
351 the pterygoid processes of the alisphenoid (Fig. 1A, D). The ventral surface of the basisphenoid  
352 has two longitudinal grooves, one on each side of the midline. The foramen ovale is externally  
353 visible on the left lateral side of AMNH-VP 1229, ventral to the otic region.

354 **Basioccipital**

355 The basioccipital is bounded dorsolaterally by the exoccipitals and rostrally by the  
356 basisphenoid. The basioccipital and exoccipitals are tightly sutured. The basioccipital is a robust  
357 bone with a groove running along the ventral midline (Fig. 2A). The large occipital condyles  
358 extend from the exoccipital onto the basioccipital with paired tubercles at their anteroventral  
359 margin (Fig. 2A). The dorsolateral border of the condyle is demarcated by a distinct groove, and  
360 the hypoglossal foramen is located on the dorsal aspect of this groove. The left side of both  
361 AMNH-VP 1229 and AMNH-VP 53523 has two adjacent foramina in this position, likely a  
362 separate hypoglossal foramen and condylar foramen.

363 A paired groove is present on the dorsolateral (endocranial) surface of the basioccipital  
364 where the basioccipital is close to contacting the ventral margin of the petrosal (Fig. 3B). This  
365 groove is interpreted as the basicapsular groove, which carries the inferior petrosal venous  
366 sinus. The groove is only present on the basioccipital for a small section, suggesting that the  
367 path of the sinus diverges from the bone rostrally.

368 **Body Mass and Agility Scores**

369           Body mass and agility scores were calculated for AMNH-VP 53523. The rostral to caudal  
370 skull length of AMNH-VP 535253 is 18.8 cm, and the basicranial length is 6.21 cm. These values  
371 provided body mass estimates of 27.3 kg and 22.0 kg, respectively, which fit into body mass  
372 ranges previously predicted for *P. celer* [28].

373           The width of the anterior semicircular canal is 5.48 mm and the height of the anterior  
374 semicircular canal is 5.15 mm—the arc radius is 2.66 mm. When applied to the appropriate  
375 agility predictive equation (see Materials and Methods), we recover two agility scores. Using  
376 the full skull length body mass, we predict an agility score of 2.97. Using the basicranial body  
377 mass, we predict an agility score of 3.057.

## 378 **Discussion**

### 379 **Squamosal**

380           Squamosal morphology is fairly conserved in protoceratids. Like others in the family, *P. celer*  
381 lacks a preglenoid process, has a slightly convex glenoid fossa, and has a low postglenoid  
382 process. A sinus venosus temporalis is present in both basal and derived protoceratids, and in  
383 several other artiodactyls including the oreodont *Merycoiododon culbertsoni* [32], the  
384 cainotheriid *Cainotherium* [33], and the camelids *Poebrotherium* and *Lama glama* [25,32]. The  
385 sinus venosus temporalis of the basal protoceratid *Leptotragulus* is reportedly larger than that  
386 of the derived protoceratid *Syndyoceras* and of non-protoceratids [7]. The sinus venosus  
387 temporalis of *P. celer* appears to be slightly larger than that of *Syndyoceras*, but distortion of  
388 the skull makes such comparisons difficult. It does not appear to be as large as the sinus  
389 venosus temporalis of *Leptotragulus*.

390 A supraglenoid foramen, similar to that of *Paratoceras*, is present in *P. celer* [2]. To our  
391 knowledge, these are the only protoceratid taxa for which a supraglenoid foramen has been  
392 reported. The lack of its identification in previous descriptions of *Protoceras* [10,18] suggests  
393 that the foramen may be variably present within the taxon. A supraglenoid foramen could not  
394 be identified on AMNH-VP 53523 even though sections of the internal canal leading to the  
395 foramen are present. This may be because of poor exterior preservation or may be a true  
396 absence. We have been unable to examine additional specimens and thus cannot comment on  
397 the general distribution of the supraglenoid foramen among protoceratids.

398 A foramen jugular spurium was reported in one specimen of *Leptotragulus* [7] but this  
399 foramen could not be located on the *P. celer* specimens.

400 External exposure of the petrosal (the mastoid condition) is common in selenodont  
401 artiodactyls, although the position and amount of exposure varies among taxa [32,34].  
402 Typically, the mastoid sits between the squamosal dorsolaterally, the exoccipital ventrally, and  
403 the supraoccipital medially. The mastoid exposure of *P. celer* is normal in this regard, and is  
404 similar to that of other protoceratids in being a laterally-oriented thin band of exposed bone  
405 [7,25]. Both *P. celer* and *Syndyoceras* have the typical mastoid position [25]. Norris stated that  
406 the mastoid region of *Leptotragulus* lies between the squamosal and supraoccipital, but the  
407 paroccipital processes were missing from the specimens he examined [7]. It is unclear whether  
408 there would have been mastoid-exoccipital contact if the paroccipital processes were intact.  
409 Mastoid contact has not been described for other basal protoceratids, but based on an  
410 illustration of *Leptoreodon marshi*, the mastoid does contact the exoccipital [12]. Norris  
411 described the presence of a mastoid foramen on the dorsal border of the exposed mastoid

412 region [7]. The high-resolution CT scan of AMNH-VP 53523 does not extend far enough caudally  
413 to determine if a mastoid foramen is present, and we do not know of any published  
414 descriptions of *Protoceras* having a mastoid foramen.

#### 415 **Ectotympanic**

416 The *P. celer* bulla is located between the squamosal, basioccipital, and paroccipital process  
417 of the exoccipital. This is typical of all protoceratids [2,25]. Joeckel and Stavas observed that  
418 *Syndyoceras* has a thin bony process extending from the basioccipital to the bulla [25]. No such  
419 process is found in *P. celer*, but this may be because of regional breakage. Scott reported that  
420 the bulla and basioccipital of *Protoceras* are too closely appressed for the petrosal to be visible  
421 through the gap [10]. There is a gap in AMNH-VP 1229, but the gap is filled with matrix and no  
422 internal structures can be observed. Scott noted that one *Protoceras* specimen had an enlarged  
423 gap because of basicranial distortion [10]. This may be the case for AMNH-VP 1229 as the  
424 specimen is dorsoventrally compressed.

425 The auditory bulla of *P. celer* is small and uninflated, a condition shared with all  
426 protoceratids [2,10,18,25]. Poor preservation of the bulla means that its internal structure  
427 cannot be determined, but previous authors have reported that *Protoceras* joins other  
428 protoceratids in having a hollow bulla [25]. Most ruminants (except tragulids) also have a  
429 hollow bulla, whereas camelids, cainotheriids, suiforms, and some merycoidodontids have a  
430 bulla filled with cancellous bone [25,32,33]. Like *Paratoceras* and *Syndyoceras*, the styliform  
431 process of *P. celer* is wide and blunt [2,25]. Other artiodactyls with small- or medium-sized  
432 bullae typically have a more slender styliform process [32].

433 The lateral ectotympanic contributes to the rostral portion of the external auditory meatus  
434 and the squamosal contributes to the dorsal and caudal portions. This construction is found in  
435 all protoceratids, as well as pecorans and the homacodontid *Bunomeryx* [2,7,25,35].  
436 Conversely, the external auditory meatus of camelids is primarily formed by the ectotympanic,  
437 having only a slight dorsal contribution from the squamosal [32,36]. In cainotheriids, the  
438 squamosal does not contribute to the external auditory meatus at all [33].

439 The *P. celer* ectotympanic also extends as a ventral projection below the external auditory  
440 meatus. A similar ventral projection is present in *Syndyoceras* [25]. In both cases, the projection  
441 is filled with cancellous bone. Joeckel and Stavas posited that this projection might be  
442 homologous to the much larger “lateral plate” of the camelid bulla [25], but concluded that it  
443 could easily be an independent derivation as several artiodactyls have a similar structure [34].  
444 The ventral projection of *P. celer* does not help to resolve this question of homology, but it does  
445 suggest that a cancellous ventral projection is common in protoceratids.

#### 446 **Bony Labyrinth**

447 To our knowledge, this is the first published description of a protoceratid bony labyrinth.  
448 The bony labyrinth morphology of other purported tylopods is not well-known; morphologies  
449 have only been described from *Cainotherium* [33,37], *Diplobune* [38], and *Bathygenys* [39].  
450 However, there have been extensive descriptions of extinct and extant ruminant bony  
451 labyrinths [40–44], and the bony labyrinths of the early artiodactyl *Diacodexis ilicis* and the  
452 extant suid *Sus scrofa* have also been described [39,45].

453 The cochlea of *P. celer* has 2.75 turns, which is more turns than *Diplobune*, moschids,  
454 cervids, and bovids, but fewer turns than *Cainotherium* and *S. scrofa* [37,38,40,44]. It is most

455 comparable to the tragulids; most tragulids have 3.0 turns or more, but *Moschiola meminna*  
456 can range from 2.75 to 3.25 turns [41,42,45]. Cochlear coiling within a species often varies by  
457 0.5 turns [42]. Using this range, the cochlea of *P. celer* is comparable to most artiodactyls,  
458 excluding *D. ilicis*, *Bathygenys*, and *S. scrofa*.

459         The *P. celer* cochlea has an aspect ratio of 0.80. Anything above 0.55 is considered to be  
460 a high aspect ratio, generally associated with “sharp-pointed” cochleae [31]. The aspect ratio of  
461 *P. celer* is higher than that of other artiodactyls; the highest aspect ratio previously reported is  
462 from a juvenile specimen of the tragulid *Hyemoschus aquaticus* (aspect ratio: 0.75), which also  
463 has 2.75 cochlear turns [42]. Aspect ratios can vary within a species; other juvenile specimens  
464 of *H. aquaticus* have aspect ratios as low as 0.62, and adult *H. aquaticus* specimens have aspect  
465 ratios ranging from 0.57-0.62 [42]. A high aspect ratio is derived for artiodactyls, with basal  
466 forms having ratios under 0.55 [39,45]. The high aspect ratio of *P. celer* is likely the result of a  
467 tightly coiled basal turn rather than a high number of coils.

468         The vestibule of *P. celer* is typical of artiodactyls. Most taxa have a slightly inflated  
469 saccule and utricle with a clear distinction between the two structures [e.g., 38,41,45], although  
470 this is not the case of *Bathygenys* [39]. The vestibular aqueduct appears to originate from the  
471 common crus, but the medial end of the aqueduct could not be identified in *P. celer*.  
472 Artiodactyls generally have a vestibular aqueduct that originates either at the base of the  
473 common crus or just anterior to the common crus [e.g., 38,41,45], so the position of the *P.*  
474 *celer* vestibular aqueduct is as expected. Not much can be said about the morphology of the  
475 semicircular canals given that only one canal is preserved in AMMH-VP 53523.

476         **Petrosal**

477           The *P. celer* petrosal is typical of protoceratids. It lacks the ventromedial flange  
478 characteristic of camelids, *Bunomeryx*, and *Cainotherium* (see ‘Comparisons: Basioccipital’ for  
479 further discussion), [7,25,33,35], and there is an endocranial ridge separating the cerebral and  
480 cerebellar faces (Fig. 3A), a feature shared with other protoceratids, with ruminants, and with  
481 anoplotheriids (Fig. 6) [7,25,38,46]. The presence of this ridge in *P. celer* indicates that a clear  
482 cerebral/cerebellar division was maintained throughout protoceratid evolution. This  
483 morphology has been used as evidence that protoceratids should be allied with ruminants  
484 [7,25], but the distribution of this morphology is not well-documented in other artiodactyl  
485 groups.

486 **Fig 6. Transverse CT slices of *Protoceras*, a ruminant, and camelid showing differences in the**  
487 **endocranial ridge.**

488 (A) Slice 88 of *Protoceras celer*, AMNH-VP 53523. (B) Slice 633 of *Muntiacus* (ruminant), UCMZ  
489 1989.47. (C) Slice 338 of *Camelus dromedarius* (camelid), UCZM 1975.496.

490           Like other protoceratids, the subarcuate fossa of *P. celer* is a shallow depression on the  
491 endocranial face, and there is no mastoid fossa. The subarcuate fossa houses the paraflocculus  
492 of the cerebellum in life [47]. The depth of the subarcuate fossa varies among artiodactyls, and  
493 the shallow nature of the protoceratid subarcuate fossa has been used as an argument for  
494 uniting protoceratids with pecoran ruminants [7,25]. This is because pecoran ruminants also  
495 have a shallow subarcuate fossa, whereas the camelids *Poebrotherium* and *Lama glama* have a  
496 deep subarcuate fossa [25,26,44]. Within Artiodactyla, camelids are unusual in having a deep  
497 subarcuate fossa, but they are not the only exception: the early artiodactyls *Bunomeryx*,  
498 *Diacodexis ilicis*, *Dichobune*, and *Gobiohyus* also have a deep subarcuate fossa [35,48], as do the

499 basal ruminants *Leptomeryx*, *Archaeomeryx*, and members of the Hypertragulidae [20,26], the  
500 basal suoid *Perchoerus* and members of the Palaeochoeridae [26,49], and members of the  
501 endemic European Cainotheriidae and Anoplotheriidae [33,37,38]. The extant ruminant  
502 *Tragulus napu* and the extant suid *Babyrousa babyrussa* also have a deep subarcuate fossa [26].  
503 Furthermore, the extant camelid *Camelus dromedarius* has a shallow subarcuate fossa [26].  
504 This character state distribution suggests that, while a shallow subarcuate fossa is shared  
505 between protoceratids and pecoran ruminants, this morphology may have evolved  
506 independently several times.

507         Perhaps a more compelling argument for a close relationship between protoceratids  
508 and ruminants—or the lack of a close relationship between protoceratids and camelids—is the  
509 absence of a mastoid fossa in protoceratids. The mastoid fossa is an indentation in the  
510 subarcuate fossa that houses the lobulus petrosus of the cerebellum [32]. Within Artiodactyla,  
511 it is only known from camelids [32], the homacodontid *Bunomeryx* [35], and the endemic  
512 European artiodactyls *Cainotherium*, *Anoplotherium*, *Dichobune*, and *Xiphodon* [33,37,46,50].  
513 Like the shallow subarcuate fossa, the lack of a mastoid fossa in protoceratids has been used to  
514 suggest that protoceratids are more closely allied with ruminants than with camelids [7,25].

515         There are a few differences between *P. celer* and other protoceratids. *Leptotragulus* has  
516 a rostral tympanic process, a thick rim of bone bordering the ventrolateral pars cochlearis  
517 below and behind the promontorium [7]. The size of this process may have caused the  
518 *Leptotragulus* fenestra cochleae to be ventrally oriented [7]. A similarly enlarged rostral  
519 tympanic process and ventrally-oriented fenestra cochleae are present on the basal ruminants  
520 *Hypertragulus*, *Archaeomeryx*, and *Leptomeryx* [20]. No such enlarged rostral tympanic process



521 is found on *P. celer* or the more derived protoceratid *Syndyoceras* [25]. However, the fenestra  
522 cochleae of *P. celer* opens ventrally like that of *Leptotragulus*. This suggests that an enlarged  
523 rostral tympanic process may be the ancestral condition for protoceratids, and that the ventral  
524 orientation of the fenestra cochleae was retained for some time after the rostral tympanic  
525 process was reduced.

526 *Protoceras celer* has a tegmen tympani fossa, which is a rostrally-directed depression on  
527 the tegmen tympani that opens towards the cerebral cavity [48]. The early artiodactyls  
528 *Diacodexis*, *Dichobune*, and *Homacodon* also have this condition [48]. Orliac and O’Leary  
529 suggested that the tegmen tympani fossa received part of the temporal lobe of the cerebrum  
530 and the trigeminal ganglion for the trigeminal nerve [51]. A tegmen tympani fossa has not been  
531 explicitly documented in other protoceratids, but Joeckel and Stavas described a well-  
532 developed shelf-like process at the rostromedial border of the *Syndyoceras* petrosal [25]. This  
533 process forms the dorsolateral border of an alisphenoid groove that may have transmitted the  
534 trigeminal nerve or ganglion [25]. *Protoceras celer* lacks such a process and does not have any  
535 structures that roof the alisphenoid in the manner depicted in CT scan of *Syndyoceras* [25].  
536 Joeckel and Stavas suggested that *Syndyoceras* was displaying a basal artiodactyl condition  
537 because neither camelids nor ruminants are known to have a similar shelf-like rostral process  
538 [25]. Given that the process is not present in more basal protoceratids such as *P. celer*, it is  
539 more likely that that this shelf-like process is a derived condition. The morphology of *P. celer*  
540 may be the precursor to the more elaborate morphology of *Syndyoceras*—if the latter has a  
541 tegmen tympani fossa (which cannot currently be determined), the fossa may be expended  
542 rostrally and medially to border the alisphenoid canal. This would be in line with the

543 suppositions of previous researchers that both structures are in close association with the  
544 trigeminal ganglion [25,51].

545 *Protoceras celer* differs from both *Leptotragulus* and *Syndyoceras* in possessing a  
546 petromastoid canal [7,25]. This canal transmits the subarcuate artery [52], and the path of the  
547 canal can be clearly followed in the high-resolution CT scan of AMNH-VP 53523. The presence  
548 of a petromastoid canal has evolved several times in artiodactyls; it is present in extant  
549 hippopotamids, some suoids, and *C. dromedarius* [26], as well as several dichobunoids [48],  
550 several extinct suoids [49], the oreodont *Merycoidodon* [26], and the anoplotheriid *Diplobune*  
551 [38]. A petromastoid canal is also found in the mesonychid *Dissacus* [53]. Orliac and O'Leary  
552 suggested that the widespread presence of the petromastoid canal in early artiodactyls may  
553 indicate that it is an artiodactyl plesiomorphy [51]. If so, then *P. celer* has either retained or  
554 independently re-evolved a primitive condition that has been lost in other protoceratids.

#### 555 **Exoccipital**

556 The exoccipital of *P. celer* is like that of other protoceratine protoceratids [2].  
557 *Syndyoceras* has a tight articulation between the paroccipital processes and the auditory bulla  
558 [25]. *Protoceras celer* also has a close contact between the structures, but we cannot comment  
559 on whether there is fusion because the bullar portion of the ectotympanic is missing in AMNH-  
560 VP 53523 and the CT scan of AMNH-VP 1229 is not of high enough resolution.

#### 561 **Basisphenoid**

562 *Syndyoceras* has a ventral midline groove running along the basioccipital onto the  
563 basisphenoid [25]. There is a midline groove present on the basioccipital of AMNH-VP 53523,  
564 but we cannot determine whether it continues onto the basisphenoid because the point of

565 contact between the two bones in indistinct. A pair of ventral grooves bordering the  
566 basisphenoid midline, just rostral to the termination of the original midline groove, was figured  
567 for *Syndyoceras* [25]. These grooves are present on AMNH-VP 53523.

#### 568 **Basioccipital**

569 The basioccipitals of *Protoceras* and *Syndyoceras* have been reported to be similar in  
570 shape and structure [25]. We concur with this assessment, although we do note some  
571 additional features. Both AMNH-VP 1229 and AMNH-VP 53523 have separate hypoglossal and  
572 condylar foramina on the left side of the skull. Separate foramina are not uncommon, and this  
573 separation often occurs on only one side of the skull. Such variation is present on specimens of  
574 *Ovis* and *Lama* (pers. obs.) and have also been documented on the mesonychid *Dissacus* [54].

575 *Syndyoceras* has a pronounced basicapsular groove on the dorsolateral surface of the  
576 basioccipital (Fig. 7E) [25]. This groove likely carried the inferior petrosal venous sinus.  
577 *Protoceras celer* also has a basicapsular groove, but it is less pronounced. There is a faint  
578 complementary groove on the ventral surface of the petrosal, suggesting that the inferior  
579 petrosal venous sinus was cradled between the two bones rather than located solely on the  
580 basioccipital (Fig. 7D). *Protoceras celer* may be displaying an intermediate condition; Norris  
581 described a similar groove on the ventromedial surface of the *Leptotragulus* petrosal, but there  
582 was no discussion as to whether an accompanying basioccipital groove was present [7].  
583 *Syndyoceras* has a small, paired sinus in the dorsal basioccipital, adjacent to the auditory bulla  
584 and immediately posterior to the basicapsular grooves. No such sinuses are present in *P. celer*.  
585 Joeckel and Stavas suggested that this paired sinus was the caudal portion of the inferior

586 petrosal venous sinus [25]. If so, the absence of this sinus in *P. celer* further indicates the minor  
587 association between the inferior petrosal venous sinus and the basioccipital.

588 **Fig 7. Diagrammatic basicranial cross-sections showing the basicapsular groove position in**  
589 **various artiodactyl families.**

590 (A) *Lama pacos* (ZM 16018), a camelid. (B) An unidentified ruminant. (C) *Cainotherium*  
591 *commune* (YPM 25037), a cainotheriid. (D) *Protoceras celer* (AMNH 53523), an intermediate  
592 protoceratine protoceratid. The bullar portion of the ectotympanic is absent in this specimen.  
593 (E) *Syndyoceras cooki* (USNM 1153), a derived synthetoceratine protoceratid. The CT slice  
594 depicted here is relatively rostral compared to the other taxa; the basicapsular groove does not  
595 appear to extend farther caudally [25]. The black circle represents the basicapsular groove.  
596 Abbreviations: Ab, auditory bulla; Boc, basioccipital; Pet, petrosal. A, B, and E are after Norris  
597 [35], C is after Theodor [33].

598 The difference in basicapsular groove location between *Syndyoceras* and *P. celer* potentially  
599 has phylogenetic significance. Most extant artiodactyls have an inferior petrosal venous sinus  
600 that passes through the space between the auditory bulla and basioccipital [35]. Conversely,  
601 camelids, *Merycoiodon*, and *Bunomeryx* have an inferior petrosal venous sinus that is  
602 sandwiched between the basioccipital and the petrosal, much like the sinus of *P. celer* [32,35]  
603 (Fig. 7). The petrosal-basioccipital location of the sinus has been previously proposed as a  
604 tylopod synapomorphy [35]. *Cainotherium* and *Syndyoceras* appear to be the extremes of this  
605 condition; *Cainotherium* carried the inferior petrosal venous sinus entirely on the petrosal, and  
606 *Syndyoceras* carried the inferior petrosal venous sinus entirely on the basioccipital (Fig. 7)  
607 [25,33]. The confinement of the inferior petrosal venous sinus to the basioccipital has been

608 used as evidence against a tylopodan affiliation for *Syndyoceras* and protoceratids as a whole  
609 [25]. The discovery that *P. celer*, a protoceratid basal to *Syndyoceras*, has a petrosal-  
610 basioccipital location for the sinus brings this conclusion into question. However, such a  
611 position does not necessitate that protoceratids are tylopods. Camelids and *Bunomeryx* both  
612 have a prominent ventromedially directed “flange” on the petrosal that roofs the basicapsular  
613 groove [25,35]. *Leptotragulus* and *P. celer* lack such a flange; the ventral border of the petrosal  
614 is rounded in both taxa [7]. This suggests that the petrosal-basioccipital condition observed in *P.*  
615 *celer* may be independently derived. The small size and short length of the basicapsular groove  
616 on the basioccipital could indicate that the inferior petrosal venous sinus was in the process of  
617 migrating from an unknown ancestral condition to the derived condition of *Syndyoceras* (Fig. 7).  
618 Several extant ruminants, all lacking a ventromedial flange, have a basicapsular groove on the  
619 petrosal [26], so the presence of such a groove on *Leptotragulus* is not particularly informative.  
620 The endocranial morphology of more basal protoceratids will need to be examined to  
621 determine what the ancestral protoceratid condition may be.

#### 622 **Agility Scores of *P. celer***

623 The completeness of the AMNH-VP 53523 left anterior semicircular canal allowed us to  
624 estimate an agility score for *P. celer*. The estimated scores, based on two body mass  
625 predictions, were 2.97 and 3.057. Agility scores are integer values that can range from 1 to 6,  
626 with 1 corresponding to the least agile mammals (e.g., sloth) and 6 corresponding to the most  
627 agile mammals (e.g., squirrel) [30]. The cursorial artiodactyl *Gazella bennetti* has an agility score  
628 of 3.37 while the slower moving artiodactyl *S. scrofa* has an agility score of 2.53 [29]. An  
629 intermediate artiodactyl, *Camelus dromedarius*, has an agility score of 2.67 [29]. These values

630 are derived from a predictive equation that incorporates all three semicircular canals. When  
631 only the anterior semicircular canal is used to calculate agility scores, as was necessitated for *P.*  
632 *celer*, *G. bennetti* has a score of 3.29, *C. dromedarius* has a score of 2.73, and *S. scrofa* has a  
633 score of 1.85; the scores have a slightly larger range but are still comparable [29]. Based on  
634 these data, the agility scores of *P. celer* suggest that it was an intermediate to slightly cursorial  
635 animal, an interpretation that is supported by its postcranial morphology.

### 636 **The Identity of AMNH-VP 645**

637 In her monograph on artiodactyl petrosals, O'Leary described and figured a petrosal,  
638 AMNH-VP 645, referred to *P. celer* [26]. The skull of AMNH-VP 645 was previously assigned to *P.*  
639 *celer* [2], but we cannot determine whether the AMNH-VP 645 petrosal belongs to the same  
640 individual; to our knowledge, there is no record of the petrosal being collected in association  
641 with the skull or being dissected out of the skull after collection. The AMNH-VP 645 petrosal  
642 closely resembles that of the basal camelid *Poebrotherium* but is in direct contrast to the  
643 morphology described for basal (*Leptotragulus*) and highly derived (*Syndyoceras*) protoceratids,  
644 implying reversals in the interpretation of several characters such as the presence of a deep  
645 subarcuate fossa. Our description of an *in-situ* petrosal of *P. celer* (AMNH-VP 53523) is in line  
646 with the morphology of other protoceratids and contrasts with the morphology of AMNH-VP  
647 645. Given that the identity of AMNH-VP 53523 is unquestionably *P. celer*, we suggest that the  
648 AMNH-VP 645 petrosal is either an incredibly aberrant specimen, or, more likely, was assigned  
649 to *P. celer* in error. A re-examination of the specimen could provide clarification.

### 650 **Conclusion**

651 Basicranial morphology, particularly petrosal morphology, has repeatedly been used as  
652 evidence for a close relationship between protoceratids and ruminants. These characters  
653 include the presence of an endocranial ridge, the lack of a ventromedial flange, the shallow  
654 subarcuate fossa, and the lack of a mastoid fossa. However, none of these features are unique  
655 to protoceratids and ruminants. The basicranial morphology of *P. celer*, an intermediate  
656 protoceratid, is similar to both basal (*Leptotragulus*) and derived (*Syndyoceras*) forms,  
657 suggesting that basicranial morphology is conserved in the family. *Protoceras celer* exhibits  
658 some intermediate conditions which align with the hypothesized phylogenetic position of the  
659 taxon [4]; the basicrania of *P. celer* may document a transition in the orientation of the fenestra  
660 cochleae and the position of the basicapsular groove. *Protoceras celer* also possesses a  
661 petromastoid canal, which is an as-yet undocumented structure in protoceratids. The  
662 petromastoid canal is highly homoplastic in artiodactyls so the presence of such a structure in  
663 *P. celer* is not wholly surprising. The basicranial morphology of *P. celer* does not greatly  
664 illuminate the evolutionary relationships between protoceratids and other selenodont  
665 artiodactyls; however, the morphology of *P. celer* indicates that protoceratid basicrania did not  
666 undergo drastic changes during their evolution, despite derived members of the family  
667 acquiring extreme morphologies in other regions of the skull.

## 668 **Acknowledgments**

669 We thank C. Norris and J. Galkin at the American Museum of Natural History, New York, and W.  
670 Fitch at the University of Calgary for access to specimens, and A. Mellone at the American  
671 Museum of Natural History, New York for consultation and images of AMNH-VP 645. We thank  
672 M. Colbert and A. Mote at the High-Resolution C-Ray CT Facility, University of Texas at Austin,

673 for scanning and initial image processing of AMNH-VP 1229 and AMNH-VP 53523, and G.  
674 McRae, I. Pauchard, Y. Zhu, J. Allan, and A. Cooke at the Centre for Mobility and Joint Health,  
675 University of Calgary, for scanning UCMZ 1989.47 and UCMZ 1975.496. We acknowledge that  
676 the specimens we used in this study were collected from the ancestral lands of the Lakota Sioux  
677 people.

## 678 **References**

- 679 1. Norris CA. The cranium of *Leptotragulus*, a hornless protoceratid (Artiodactyla:  
680 Protoceratidae) from the Middle Eocene of North America. *J Vertebr Paleontol.*  
681 2000;20(2):341–8.
- 682 2. Webb SD. *Kyptoceras amatorum*, new genus and species from the Pliocene of Florida,  
683 the last protoceratid artiodactyl. *J Vertebr Paleontol.* 1981;1(3–4):357–65.
- 684 3. Patton TH, Taylor BE. The Protoceratinae (Mammalia, Tylopoda, Protoceratidae) and the  
685 systematics of the Protoceratidae. *Bull Am Museum Nat Hist.* 1973;150:351–413.
- 686 4. Janis C. Evolution of horns in ungulates: ecology and paleoecology. *Biol Rev.*  
687 1982;57(2):261–318.
- 688 5. Prothero DR. Protoceratidae. In: Janis CM, Scott KM, Jacobs LL, editors. *Evolution of*  
689 *Tertiary Mammals of North America, Volume 1, Terrestrial Carnivores, Ungulates, and*  
690 *Ungulate-like Mammals.* Cambridge: Cambridge University Press; 1998. p. 431–8.
- 691 6. Prothero DR, Ludtke JA. Family Protoceratidae. In: Prothero DR, Foss SE, editors. *The*  
692 *Evolution of Artiodactyls.* Baltimore: The Johns Hopkins University Press; 2007. p. 169–  
693 76.
- 694 7. Patton TH, Taylor BE. The Synthetoceratinae (Mammalia, Tylopoda, Protoceratidae). *Bull*



- 695 Am Museum Nat Hist. 1971;145:123–218.
- 696 8. Marsh OC. A horned artiodactyle (*Protoceras celer*) from the Miocene. Am J Sci.  
697 1891;41(241):5a-6a.
- 698 9. Osborn HF, Wortman JL. Characters of *Protoceras* (Marsh), the new artiodactyl from the  
699 Lower Miocene. Bull Am Museum Nat Hist. 1892;18:351–71.
- 700 10. Scott WB. The osteology and relationships of *Protoceras*. J Morphol. 1895;2(2):303–63.
- 701 11. Scott WB. The selenodont artiodactyls of the Uinta Eocene. Trans Wagner Free Inst Sci.  
702 1899;6:1–120.
- 703 12. Wortman JL. The extinct Camelidae of North America and some associated forms. Bull  
704 AMNH. 1898;10:1–141.
- 705 13. Matthew WD. Notice of two new genera of mammals from the Oligocene of South  
706 Dakota. Bull Am Museum Nat Hist. 1905;21:21–6.
- 707 14. Colbert EH. The osteology and relationships of *Archaeomeryx*, an ancestral ruminant. Am  
708 Museum Novit. 1941;1135:1–24.
- 709 15. Stirton RA. Comments on the relationships of the cervoid family Palaeomerycidae. Am J  
710 Sci. 1944;242(12):633–55.
- 711 16. Simpson GG. The principles of classification and a classification of mammals. Bull Am  
712 Museum Nat Hist. 1945;85:1–350.
- 713 17. Janis CM, Theodor JM. Cranial and postcranial morphological data in ruminant  
714 phylogenetics. Zitteliana R B Abhandlungen der Bayer Staatssammlung für Paläontologie  
715 und Geol. 2014;32(32):15–32.
- 716 18. Scott WB. The Mammalian fauna of the White River Oligocene: Part IV. Artiodactyla.

- 717 Trans Am Philos Soc. 1940;28(4):363–746.
- 718 19. Stirton R. Relationships of the protoceratid artiodactyls and description of a new genus.  
719 Berkeley: University of California Press; 1967. 44 p.
- 720 20. Webb SD, Taylor EB. The phylogeny of hornless ruminants and a description of the  
721 cranium of *Archaeomeryx*. Bull Am Museum Nat Hist [Internet]. 1980;167(3):117–58.  
722 Available from:  
723 <http://digitallibrary.amnh.org/dspace/handle/2246/1042>  
724 <http://digitallibrary.amnh.org/dspace/bitstream/2246/1042/1/v2/dspace/ingest/pdfSource/bul/B167a03.pdf>  
725 <http://digitallibrary.amnh.org/dspace/handle/2246/1042?show=full>
- 726 21. Gentry AW, Hooker JJ. The phylogeny of the Artiodactyla. In: Benton MJ, editor. The  
727 Phylogeny and Classification of the Tetrapods, Volume 2: Mammals. Oxford: Clarendon  
728 Press; 1988. p. 235–72.
- 729 22. Gazin CL. A review of the upper Eocene Artiodactyla of North America. *Smithson Misc*  
730 *Collect.* 1955;128(8):1–96.
- 731 23. Wilson JA. Early Tertiary vertebrate faunas, Vieja Group and Buck Hill Group, Trans-Pecos  
732 Texas: Protoceratidae, Camelidae, Hypertragulidae. Texas Meml Museum, Univ Texas  
733 Austin. 1974;23:1–34.
- 734 24. Golz DJ. Eocene Artiodactyla of southern California. *Nat Hist Museum Los Angeles Cty Sci*  
735 *Bull.* 1976;26:1–85.
- 736 25. Joeckel RM, Stavas JM. Basicranial anatomy of *Syndyoceras cooki* (Artiodactyla,  
737 Protoceratidae) and the need for a reappraisal of tylopod relationships. *J Vertebr*  
738 *Paleontol.* 1996;16(2):320–7.

- 739 26. O’Leary MA. An anatomical and phylogenetic study of the osteology of the petrosal of  
740 extant and extinct artiodactylans (Mammalia) and relatives. Bull Am Museum Nat Hist  
741 [Internet]. 2010;335:1–206. Available from:  
742 <http://www.bioone.org/doi/abs/10.1206/335.1>
- 743 27. Spaulding M, O’Leary MA, Gatesy J. Relationships of Cetacea (Artiodactyla) among  
744 mammals: increased taxon sampling alters interpretations of key fossils and character  
745 evolution. PLoS One. 2009;4(9):1–14.
- 746 28. Janis CM. Correlation of cranial and dental variables with body size in ungulates and  
747 macropodoids. In: Damuth J, MacFadden BJ, editors. Body Size in Mammalian  
748 Paleobiology: Estimation and Biological Implications. Canada: Cambridge University  
749 Press; 1990. p. 255–300.
- 750 29. Spoor F, Garland T, Krovitz G, Ryan TM, Silcox MT, Walker A. The primate semicircular  
751 canal system and locomotion. PNAS. 2007;104(26):10808–12.
- 752 30. Ekdale EG. Comparative anatomy of the bony labyrinth (inner ear) of placental mammals.  
753 PLoS One. 2013;8(6):27–8.
- 754 31. Silcox MT, Bloch JI, Boyer DM, Godinot M, Ryan TM, Spoor F, et al. Semicircular canal  
755 system in early primates. J Hum Evol [Internet]. 2009;56(3):315–27. Available from:  
756 <http://dx.doi.org/10.1016/j.jhevol.2008.10.007>
- 757 32. Whitmore FC. Cranial morphology of some Oligocene Artiodactyla. United States Geol  
758 Surv Prof Pap. 1953;243-H:117–60.
- 759 33. Theodor JM. Micro-computed tomographic scanning of the ear region of *Cainotherium*:  
760 character analysis and implications. J Vertebr Paleontol. 2010;30(1):236–2.

- 761 34. Pearson HS. On the skulls of early Tertiary Suidae, together with an account of the otic  
762 region in some other primitive Artiodactyla. Philos Trans R Soc London Ser B, Contain Pap  
763 a Biol Character. 1927;215:389–460.
- 764 35. Norris CA. The cranium of *Bunomeryx* (Artiodactyla: Homacodontidae) from the Upper  
765 Eocene Uinta deposits of Utah and its implications for tylopod systematics. J Vertebr  
766 Paleontol. 1999;19(4):742–51.
- 767 36. Webb SD. The osteology of *Camelops*. Bull Los Angeles Cty Museum. 1965;1:1–54.
- 768 37. Hürzeler J. Osteologie und Odontologie der Caenotheriden. Abhandlungen der  
769 Schweizerschen Palaeontol Gesellschaft. 1936;58–59:1–111.
- 770 38. Orliac MJ, Araújo R, Lihoreau F. The petrosal and bony labyrinth of *Diplobune minor*, an  
771 enigmatic Artiodactyla from the Oligocene of Western Europe. J Morphol.  
772 2017;278(9):1168–84.
- 773 39. Ekdale EG. Variation within the bony labyrinth of mammals. The University of Texas,  
774 Austin, TX; 2009.
- 775 40. Menecart B, DeMiguel D, Bibi F, Rössner GE, Métais G, Neenan JM, et al. Bony labyrinth  
776 morphology clarifies the origin and evolution of deer. Sci Rep. 2017;7(1):1–11.
- 777 41. Menecart B, Costeur L. A *Dorcatherium* (Mammalia, Ruminantia, Middle Miocene)  
778 petrosal bone and the tragulid ear region. J Vertebr Paleontol. 2016;36(6):e1211665.
- 779 42. Menecart B, Costeur L. Shape variation and ontogeny of the ruminant bony labyrinth,  
780 an example in Tragulidae. J Anat. 2016;229(3):422–35.
- 781 43. Menecart B, Rössner GE, Métais G, DeMiguel D, Schulz G, Müller B, et al. The petrosal  
782 bone and bony labyrinth of early to middle Miocene European deer (Mammalia,

- 783 Cervidae) reveal their phylogeny. *J Morphol.* 2016;277(10):1329–38.
- 784 44. Costeur L. The petrosal bone and inner ear of *Micromeryx flourensianus* (Artiodactyla,  
785 Moschidae) and inferred potential for ruminant phylogenetics. *Zitteliana R B*  
786 *Abhandlungen der Bayer Staatssammlung für Palaontologie und Geol.* 2014;32(32):99–  
787 114.
- 788 45. Orliac MJ, Benoit J, O’Leary MA. The inner ear of *Diacodexis*, the oldest artiodactyl  
789 mammal. *J Anat.* 2012;221(5):417–26.
- 790 46. Dechaseaux C. Artiodactyles primitifs des Phosphorites du Quercy II. Etude sur le genre  
791 *Xiphodon*. *Ann Paléontologie.* 1967;53:27–47.
- 792 47. Gannon PJ, Eden AR, Laitman JT. The subarcuate fossa and cerebellum of extant  
793 primates: comparative study of a skull-brain interface. *Am J Phys Anthropol.*  
794 1988;77(2):143–64.
- 795 48. Orliac MJ, O’Leary MA. Comparative anatomy of the petrosal bone of dichobunoids, early  
796 members of Artiodactylamorpha (Mammalia). *J Mamm Evol.* 2014;21(3):299–320.
- 797 49. Orliac MJ. The petrosal bone of extinct Suoidea (Mammalia, Artiodactyla). *J Syst*  
798 *Palaeontol.* 2013;11(8):925–45.
- 799 50. Dechaseaux C. Artiodactyles primitifs des phosphorites du Quercy. *Ann Paléontologie,*  
800 *Vertebr.* 1974;60:59–100.
- 801 51. Orliac MJ, O’Leary MA. Comparative anatomy of the petrosal bone of dichobunoids, early  
802 members of Artiodactylamorpha (Mammalia). *J Mamm Evol.* 2014;21(3):299–320.
- 803 52. Mazzone A. The subarcuate artery in man. *Laryngoscope.* 1970;80:69–79.
- 804 53. Luo Z, Gingerich PD. Terrestrial Mesonychia to aquatic Cetacea: transformation of the

- 805           basicranium and evolution of hearing in whales. Univ Michigan Pap Paleontol.  
806           1999;31:1–98.
- 807   54.   Geisler JH, Mckenna MC. A new species of mesonychian mammal from the lower Eocene  
808           of Mongolia and its phylogenetic relationships Phylogenetic methods. Acta Palaeontol  
809           Pol. 2007;52(1):189–212.
- 810

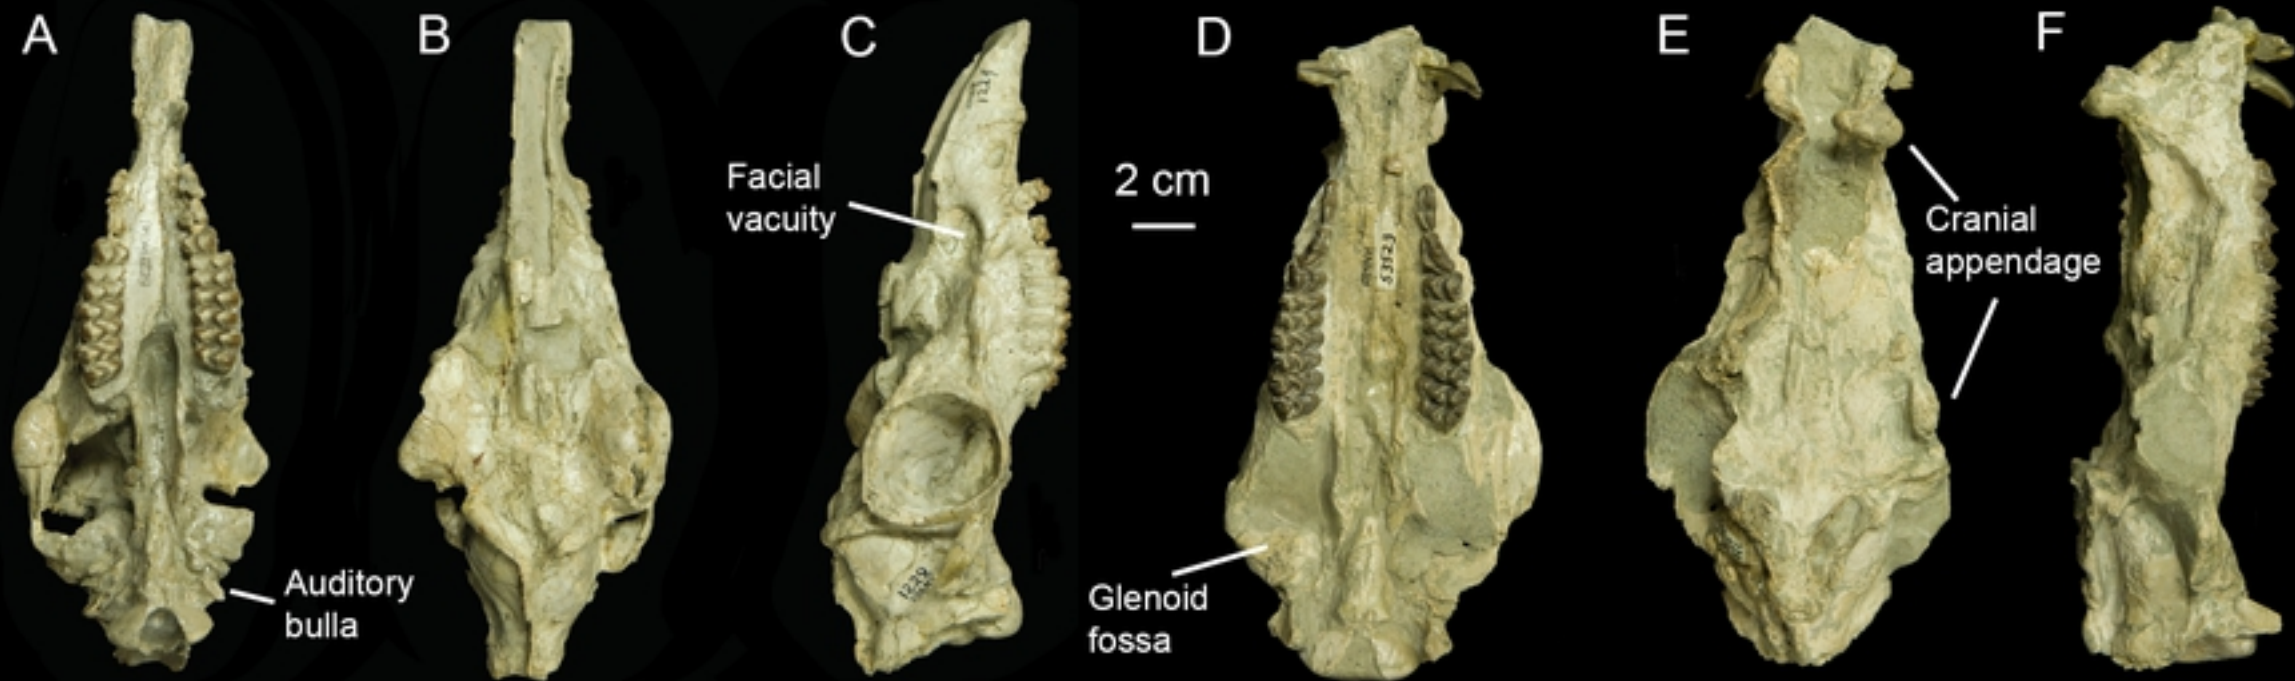

Figure 1

A

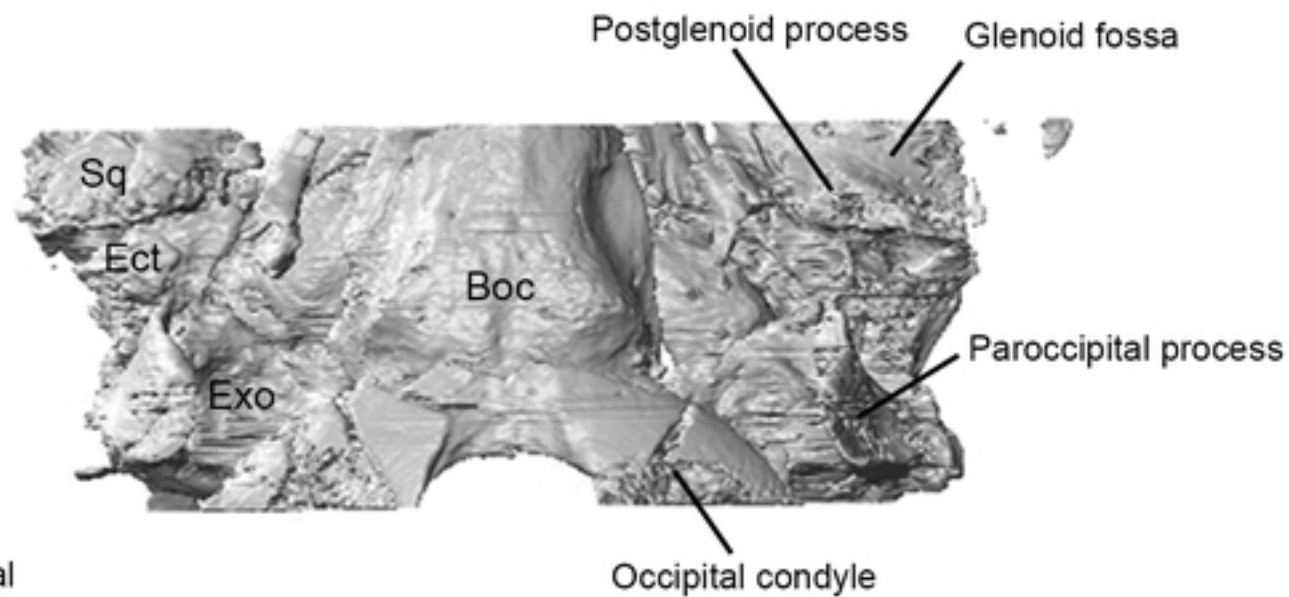

B

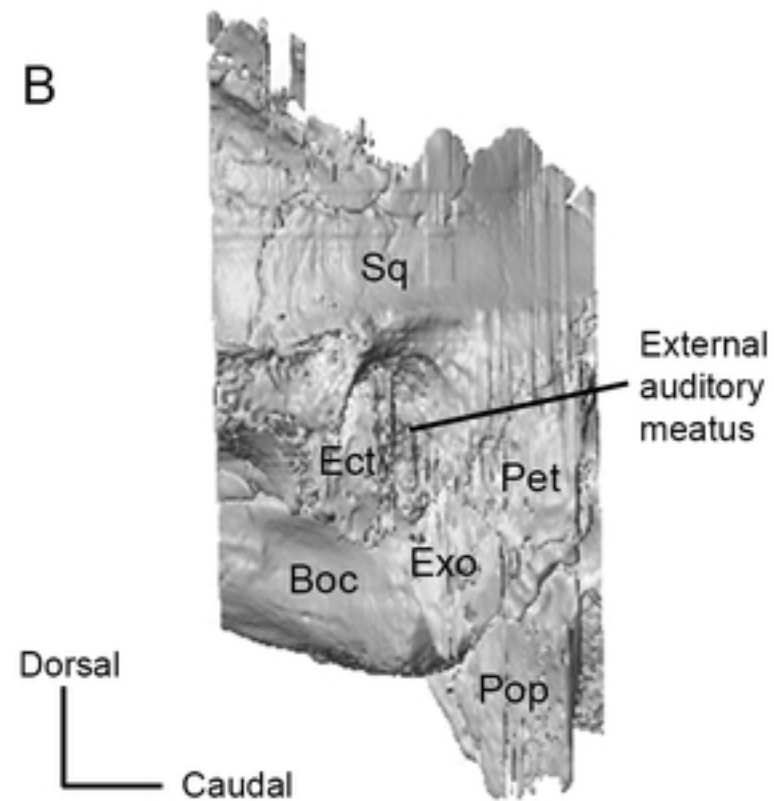

Figure 2



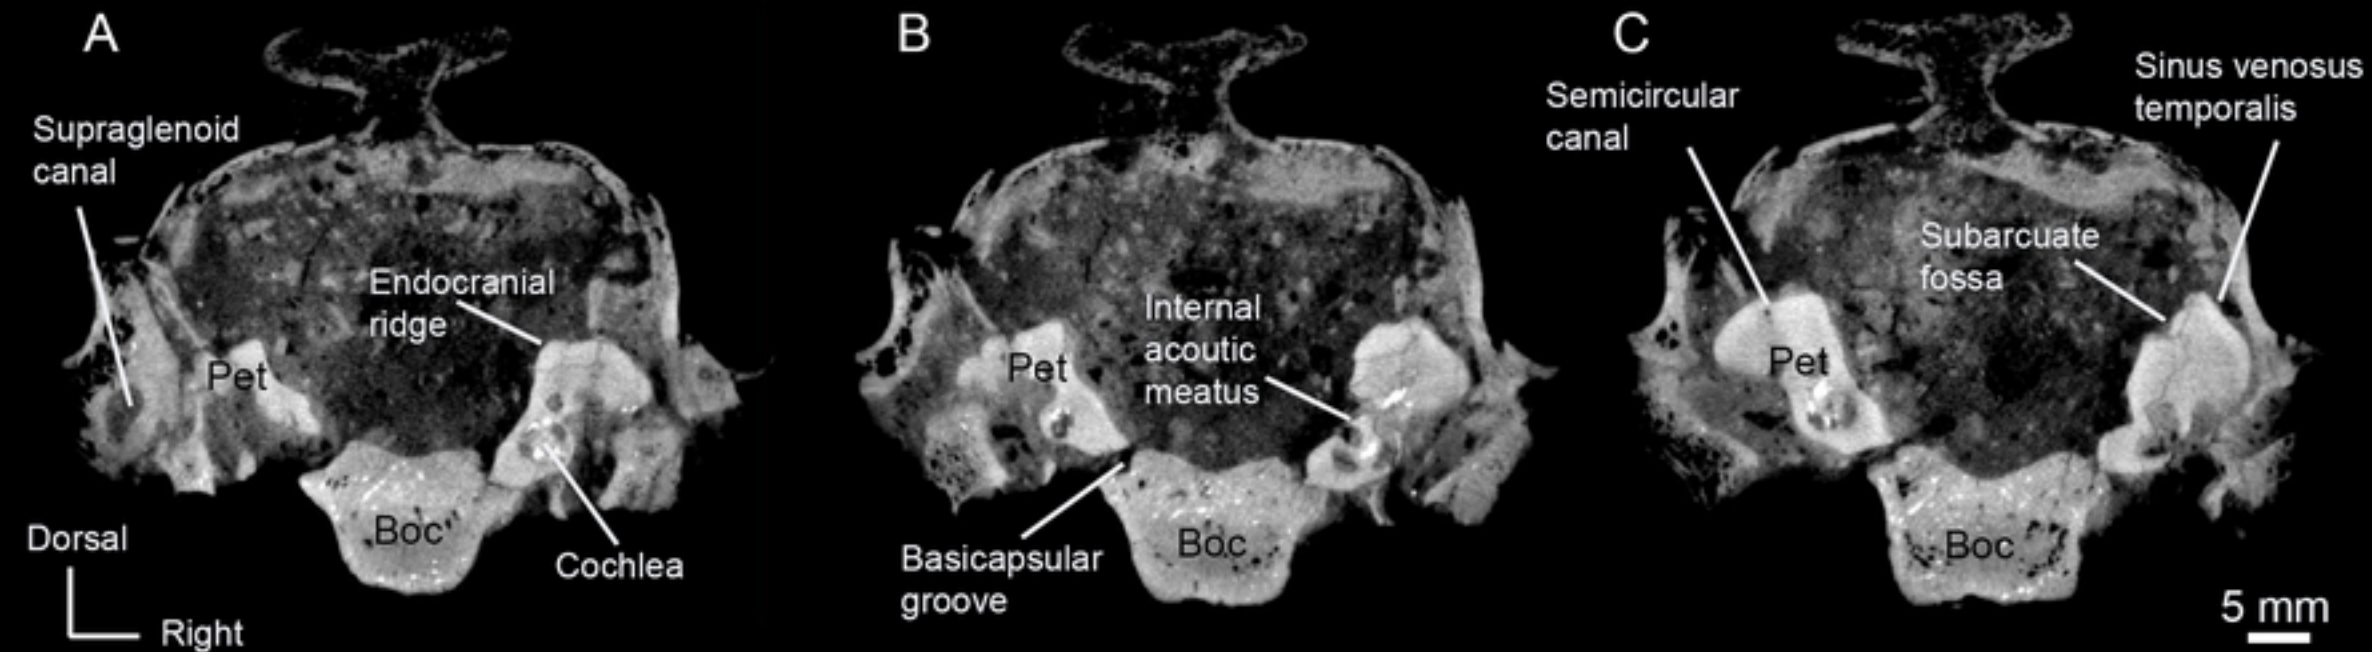

Figure3

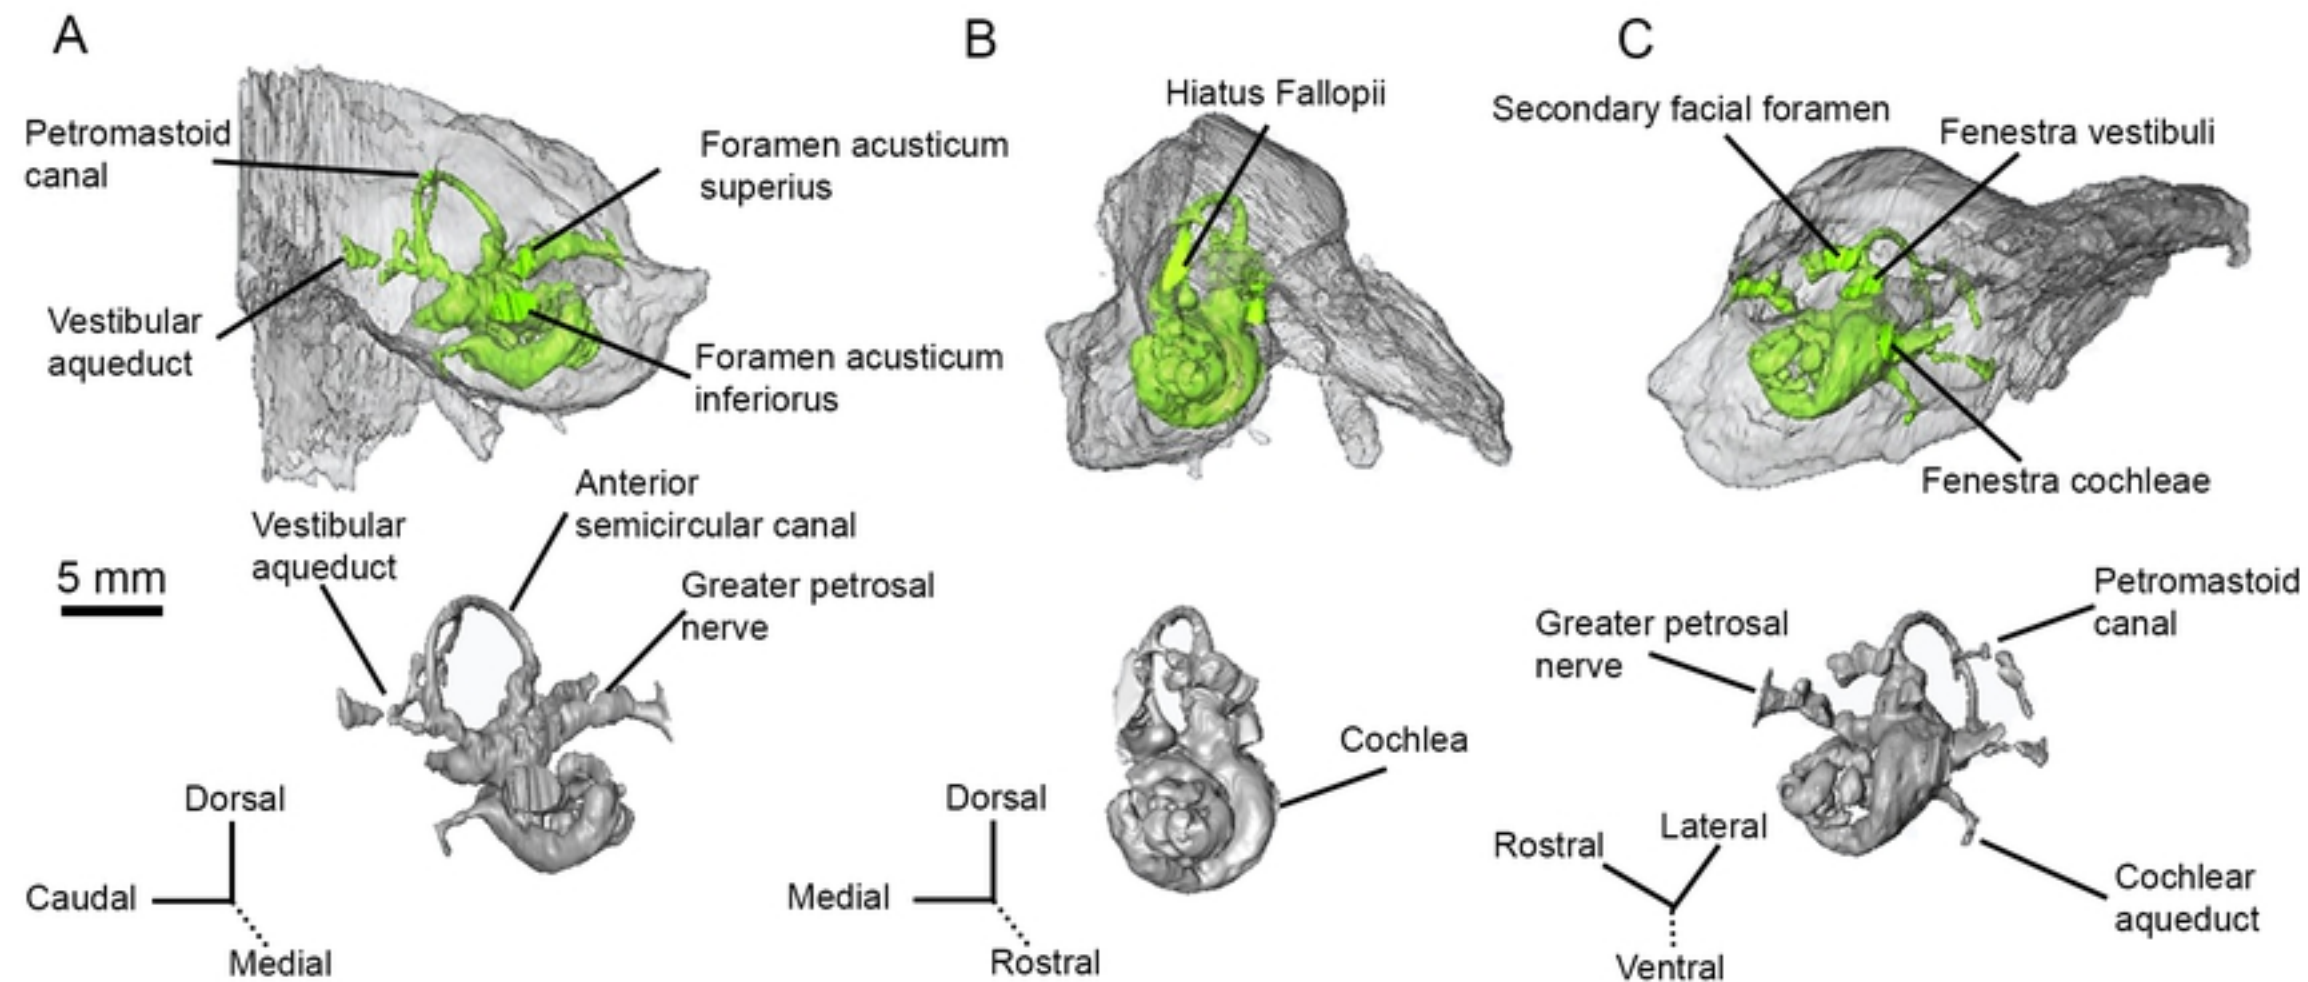

Figure 4

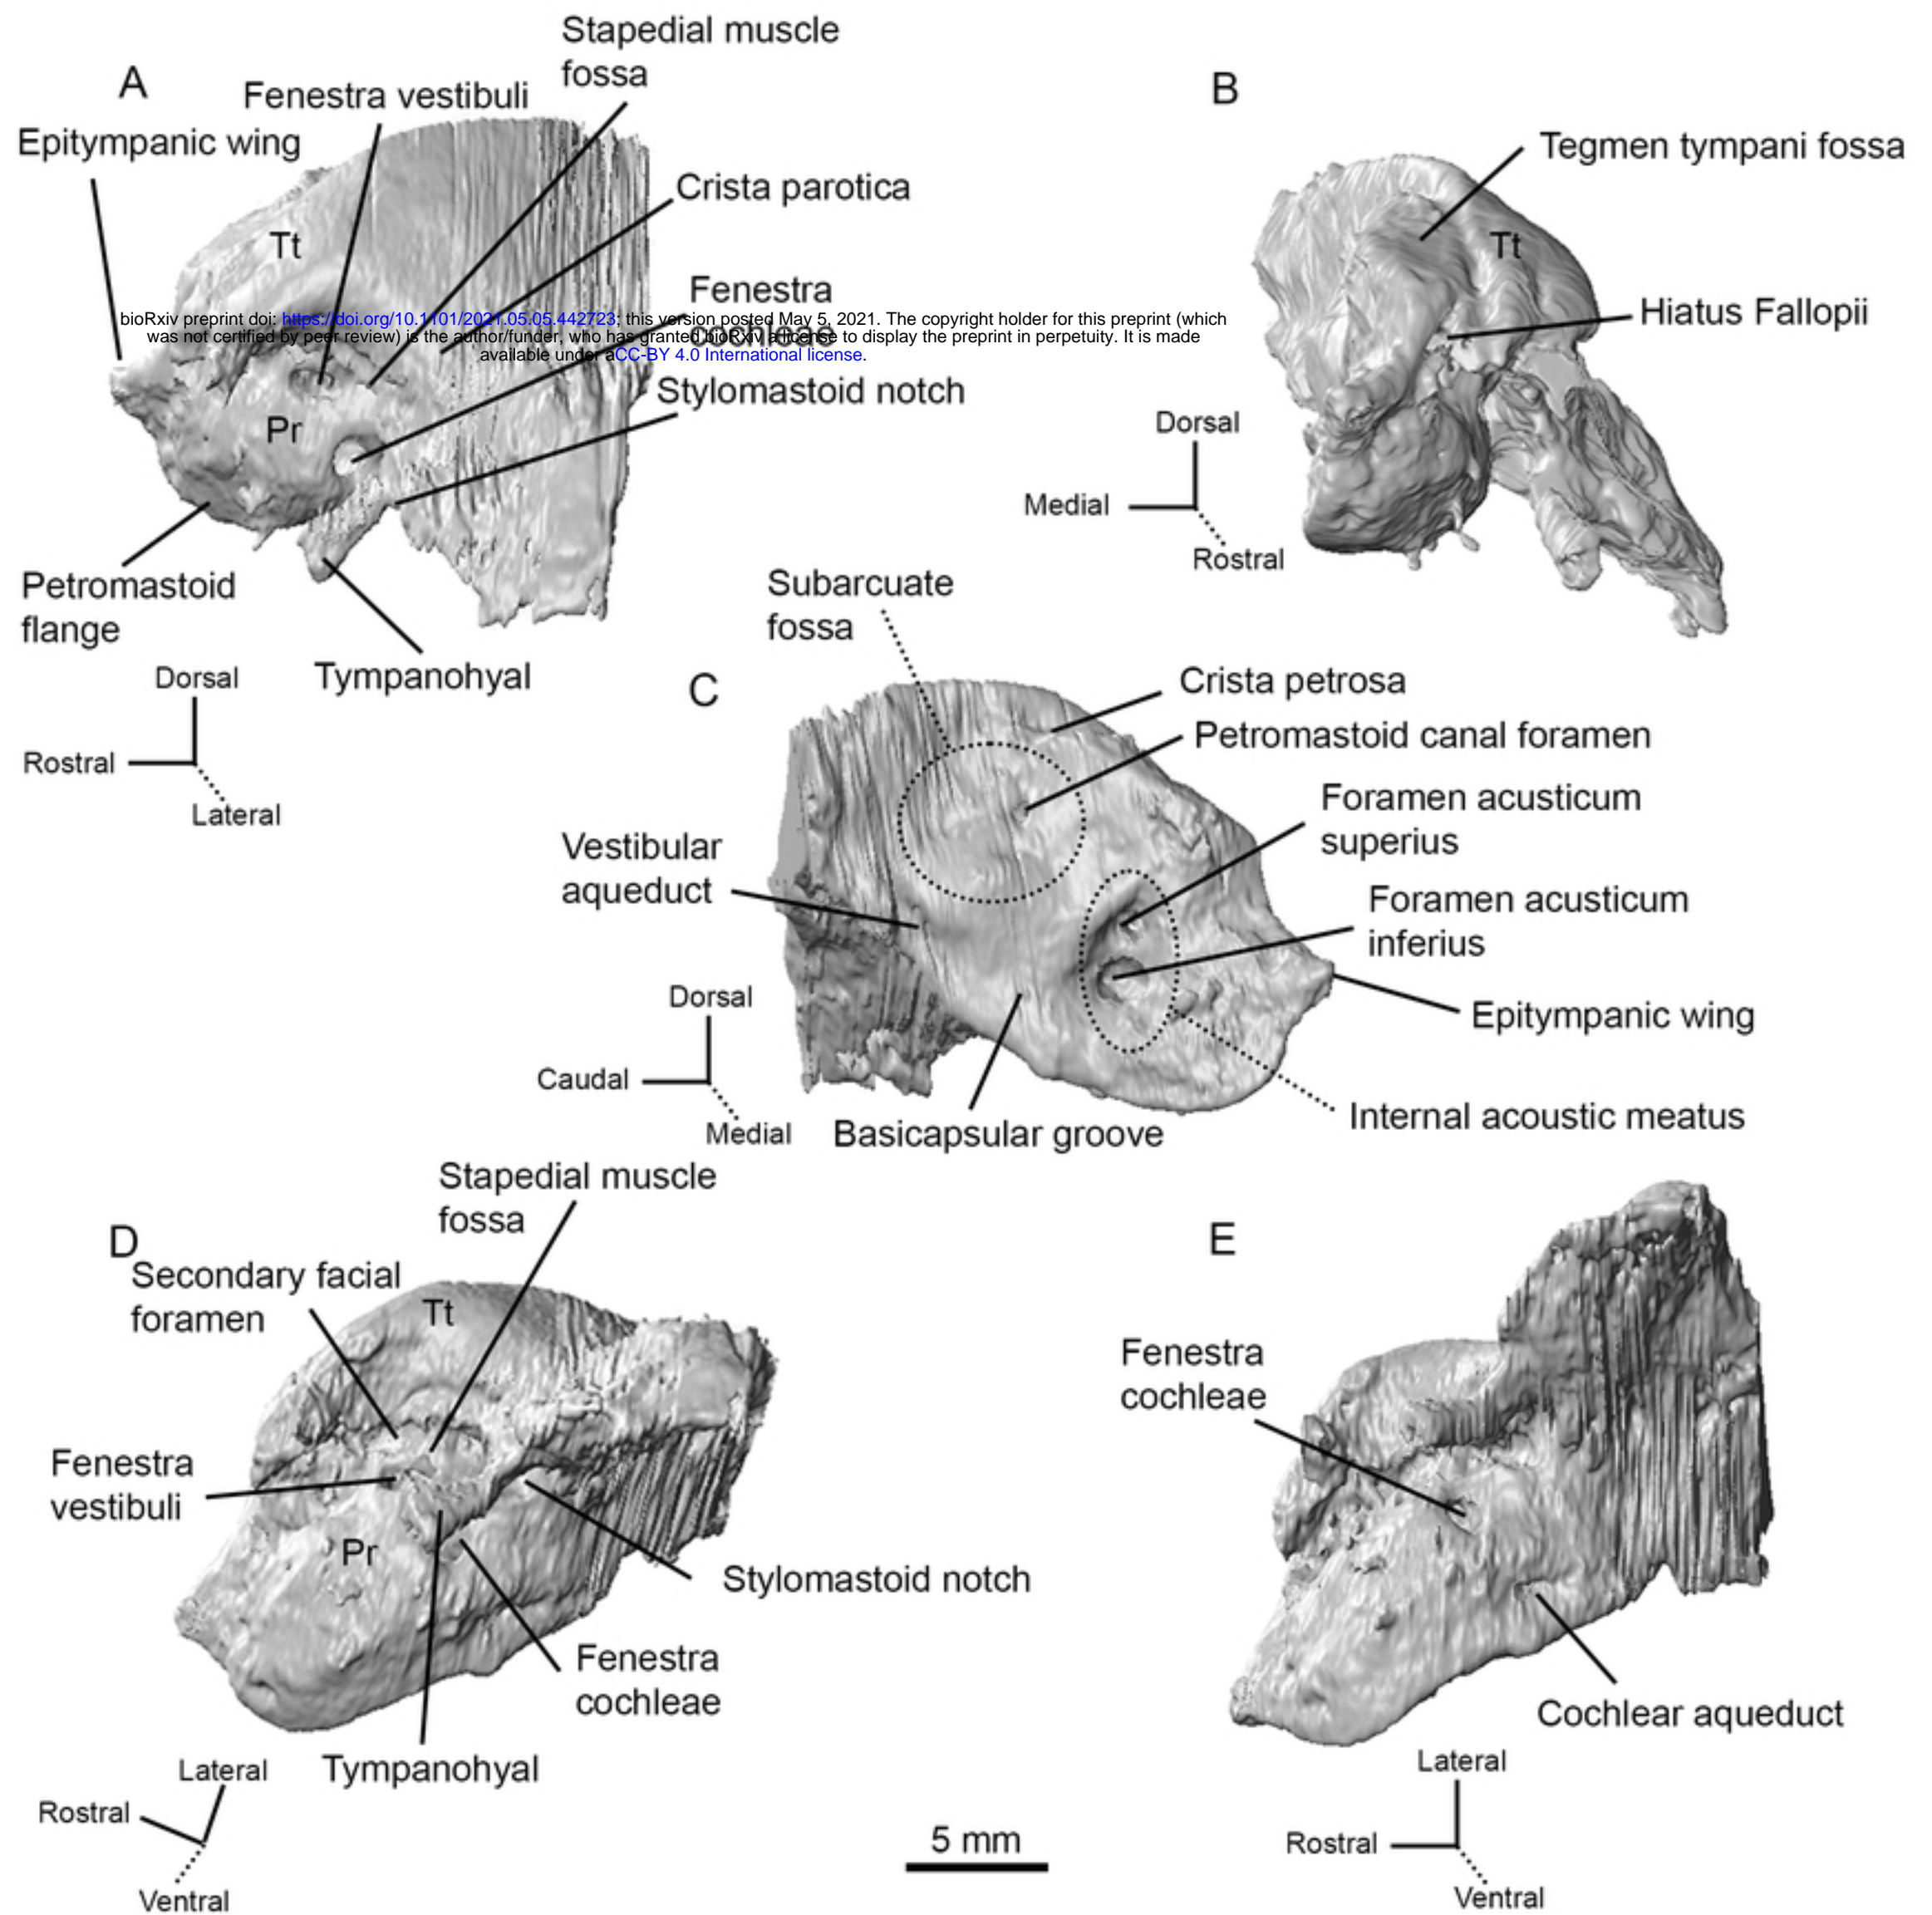



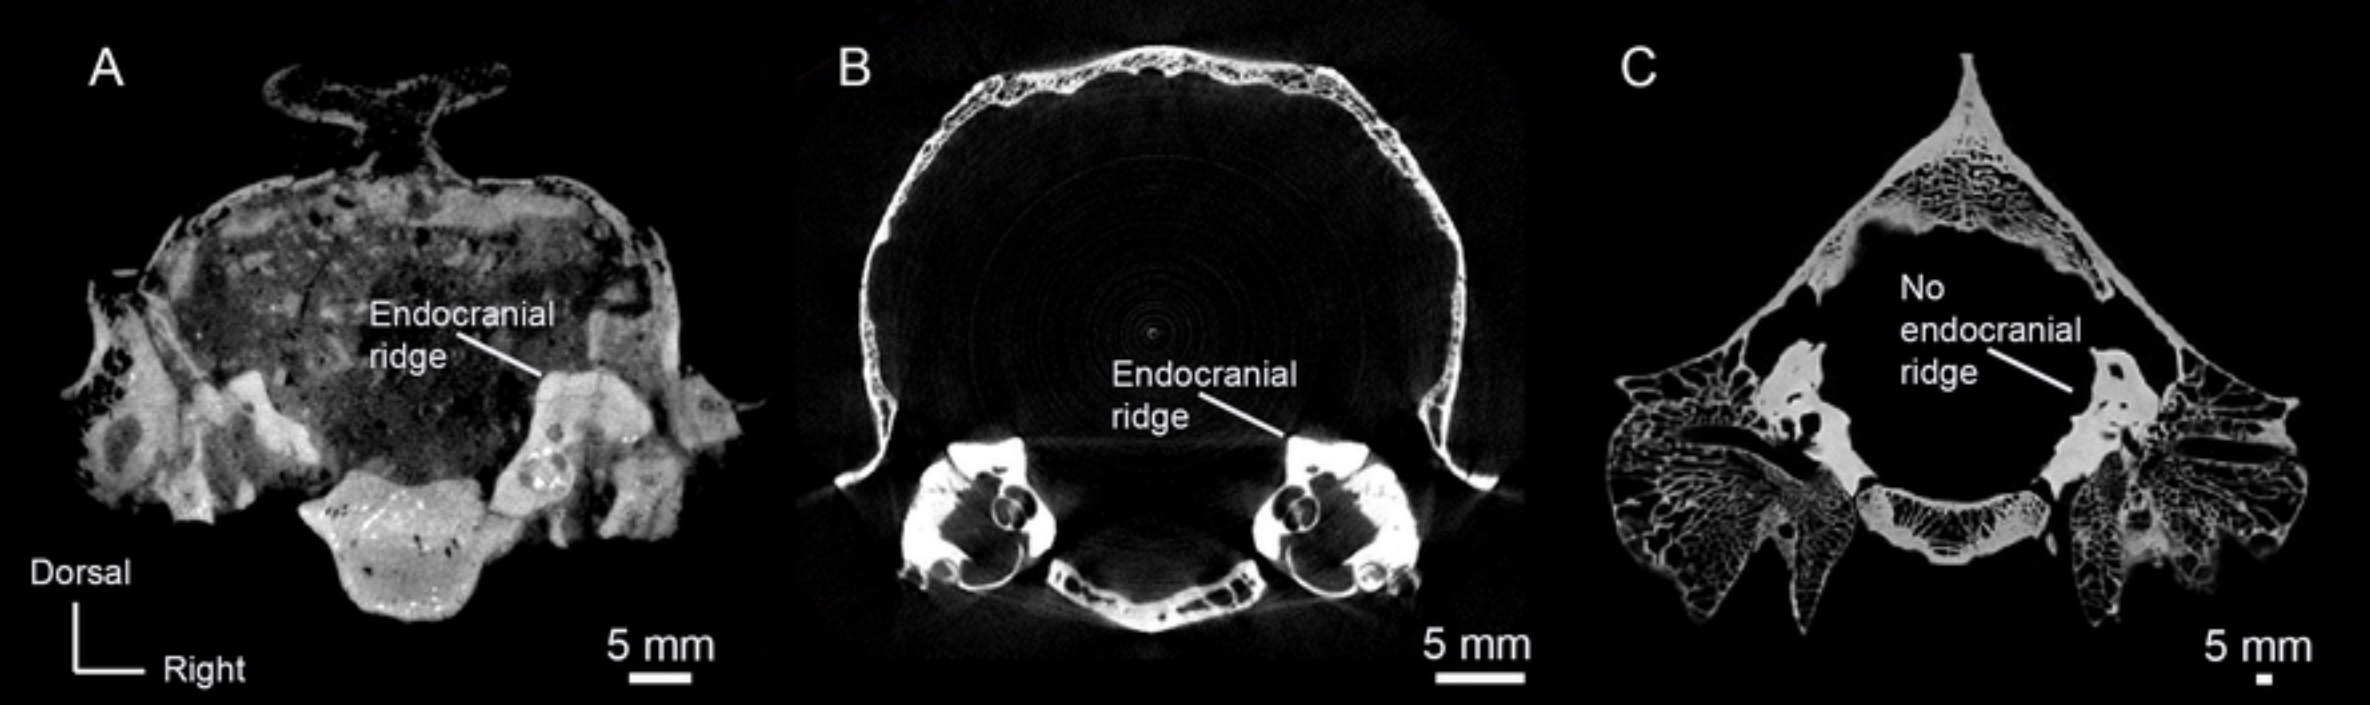

Figure 6

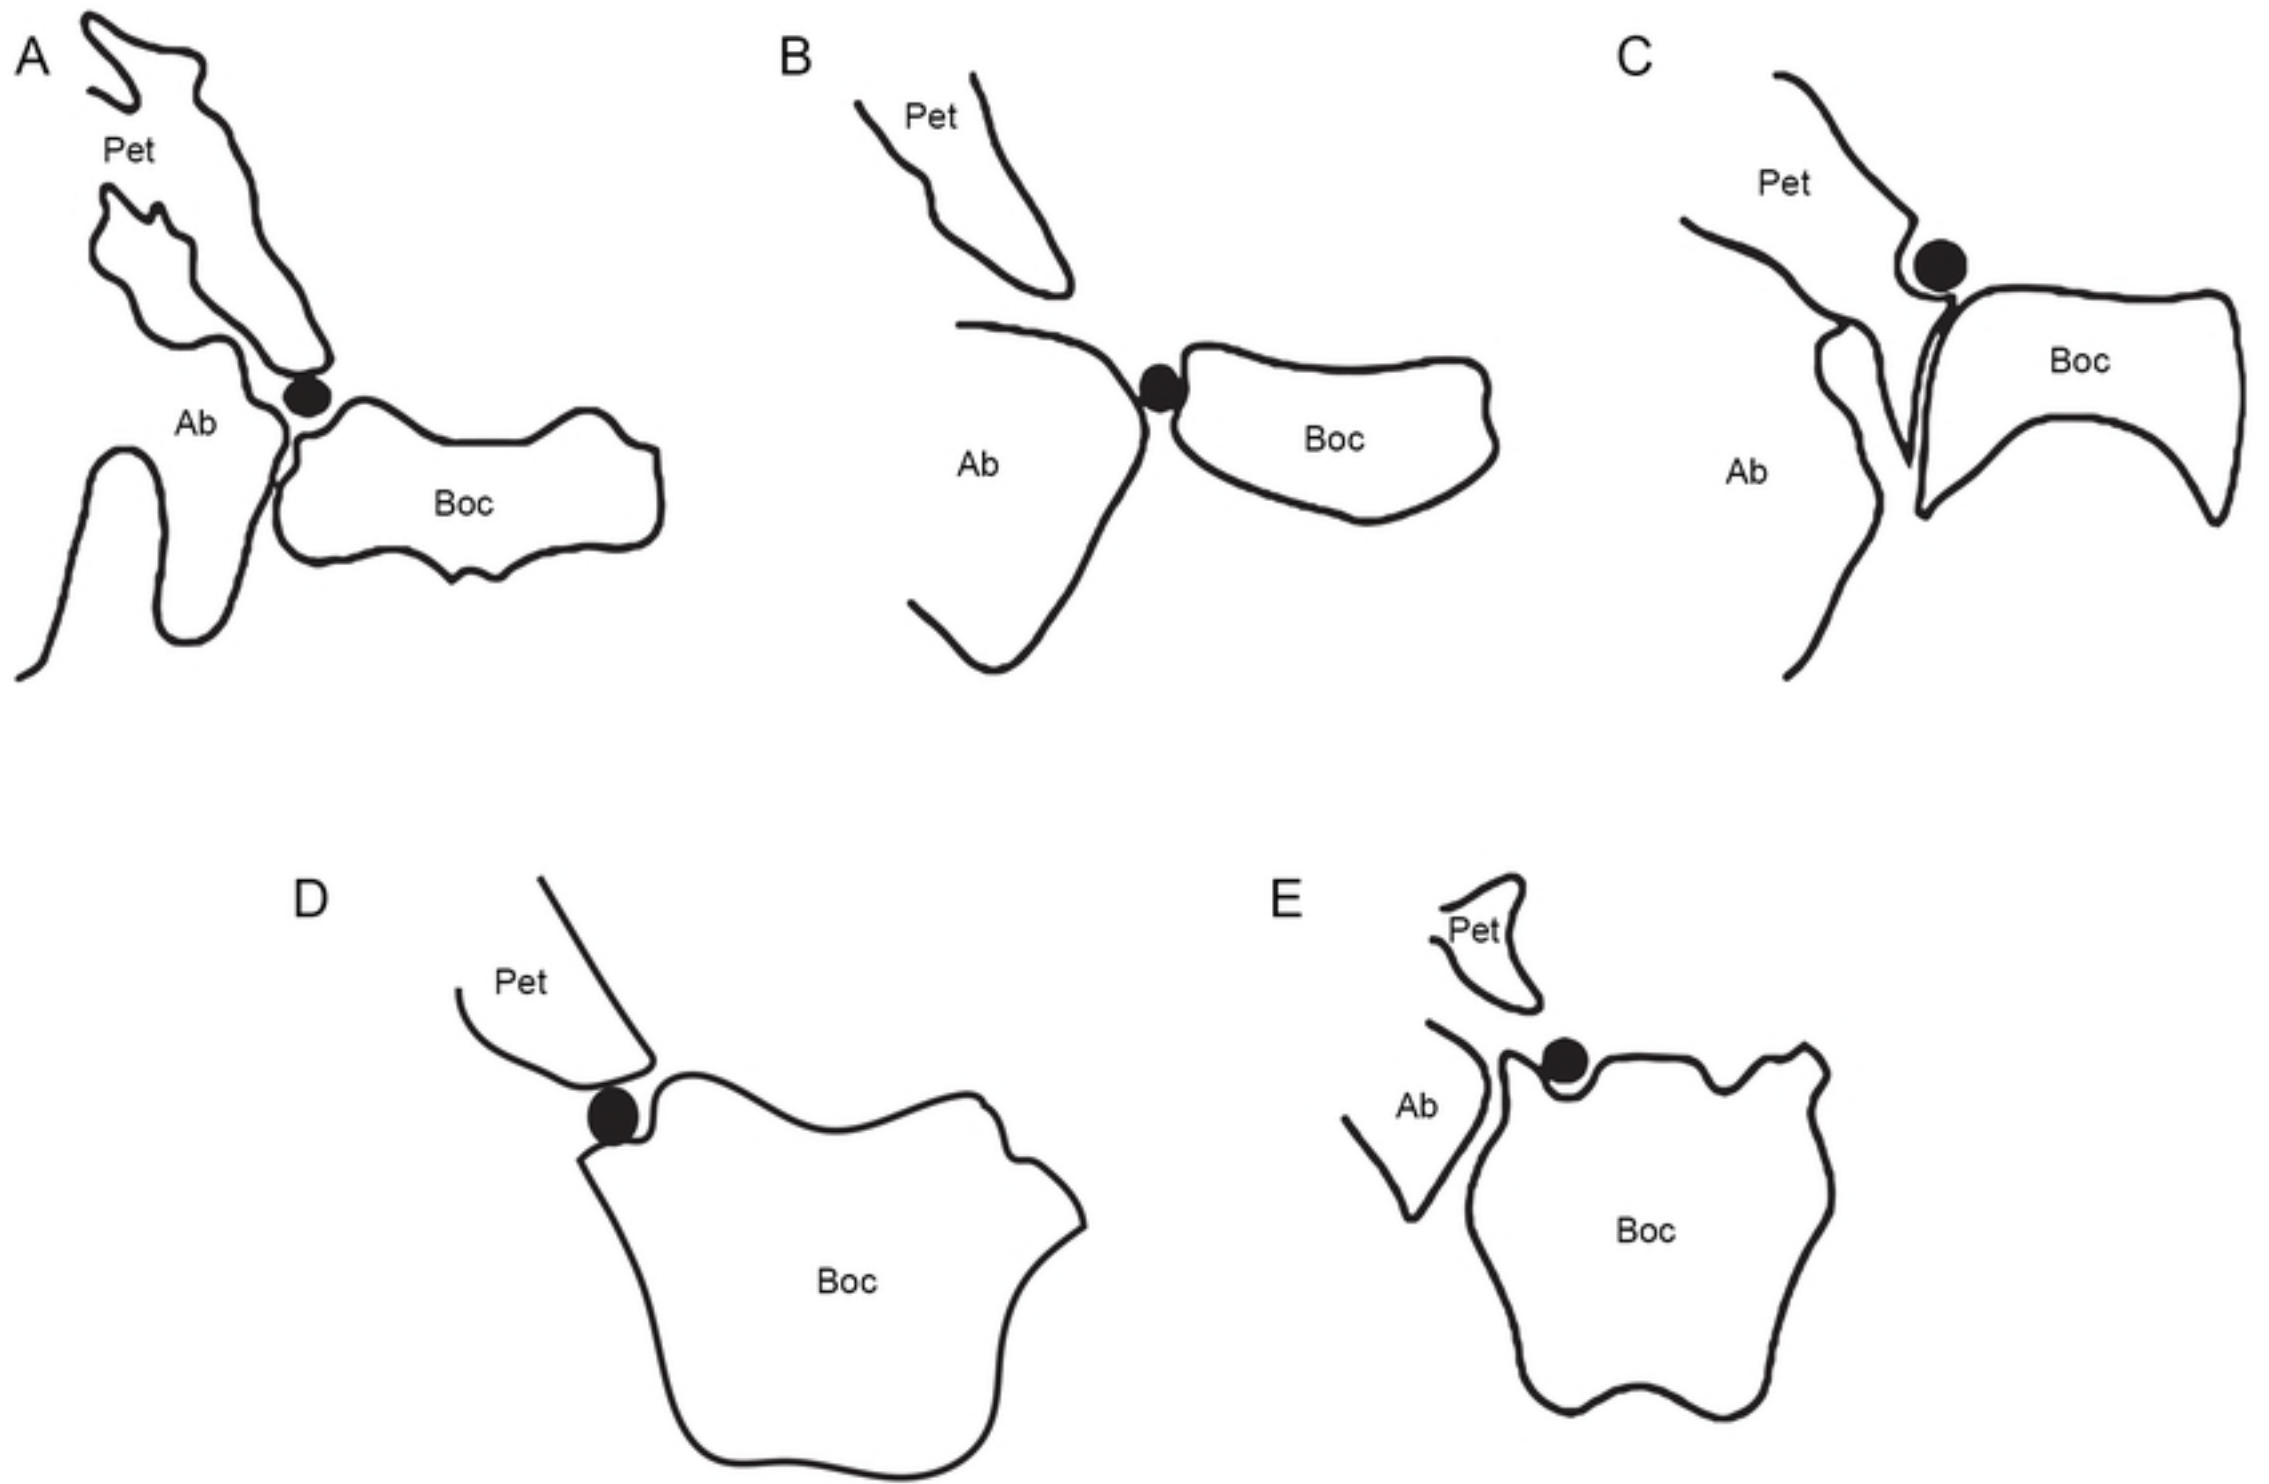

Figure7
